# Supplementary material
Source: PubMed Central journal article supplement (PMC2850041)
Supplement: pp.109.151753_1.pdf [file pp.109.151753_1.pdf]

## SUPPLEMENTAL FIGURES

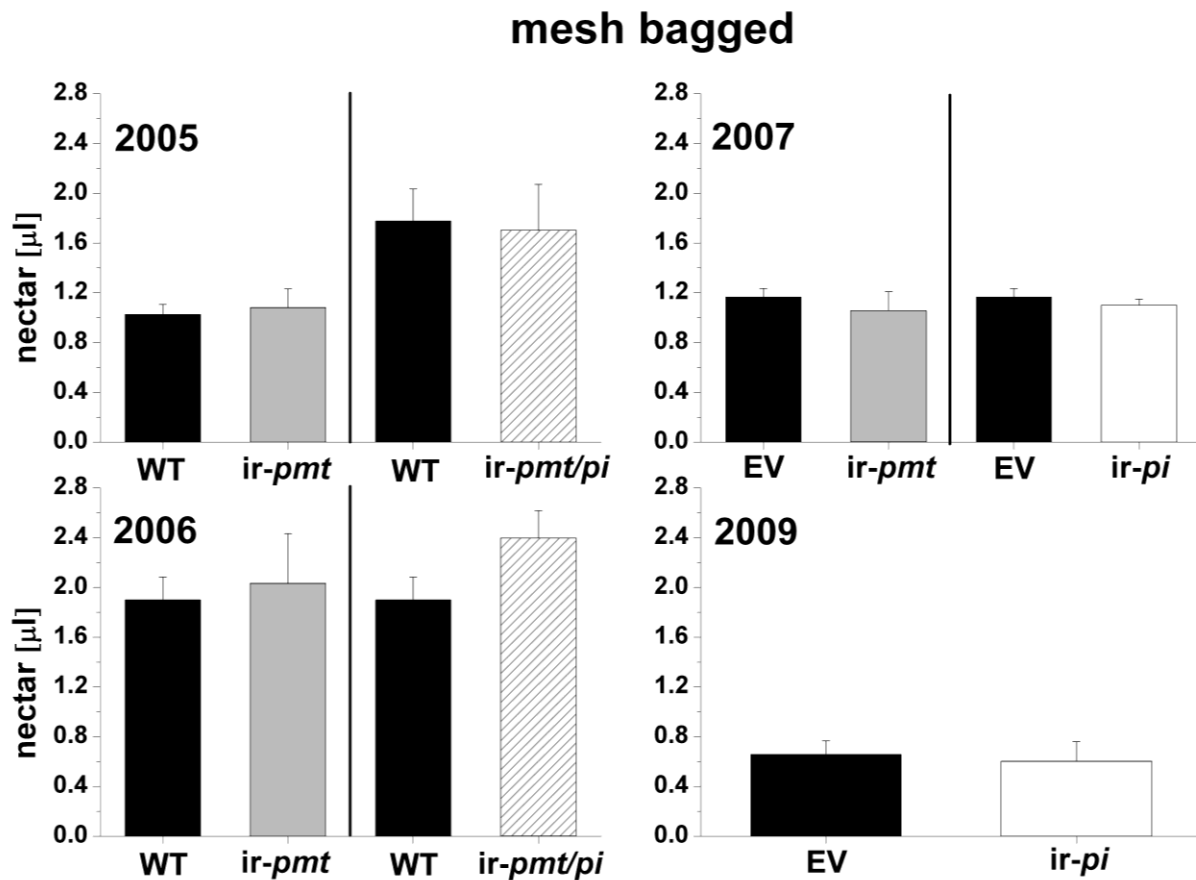

**Supplemental Figure S1:** Standing nectar volume from flowers of WT, EV, *ir-pmt*, *ir-pmt/pi* and *ir-pi* plants which were mesh bagged to exclude native floral visitors during the 2005, 2006, 2007, and 2009 field seasons (related to Figure 1).

Mean ( $\pm$ SE) standing nectar volume in flowers of *N. attenuata* wild-type plants (WT) or empty-vector plants (EV), and plants silenced in proteinase inhibitors (*ir-pi*), nicotine (*ir-pmt*) or both proteinase inhibitors and nicotine (*ir-pmt/pi*) production. Nectar volume was measured between 6:00 and 7:30 a.m. in flowers that had opened for the first time the previous night. No significant differences were determined (Student's t-test,  $p > 0.05$ ). Different nectar volumes between the experiments are caused by different environmental conditions on the different days experiments were conducted.

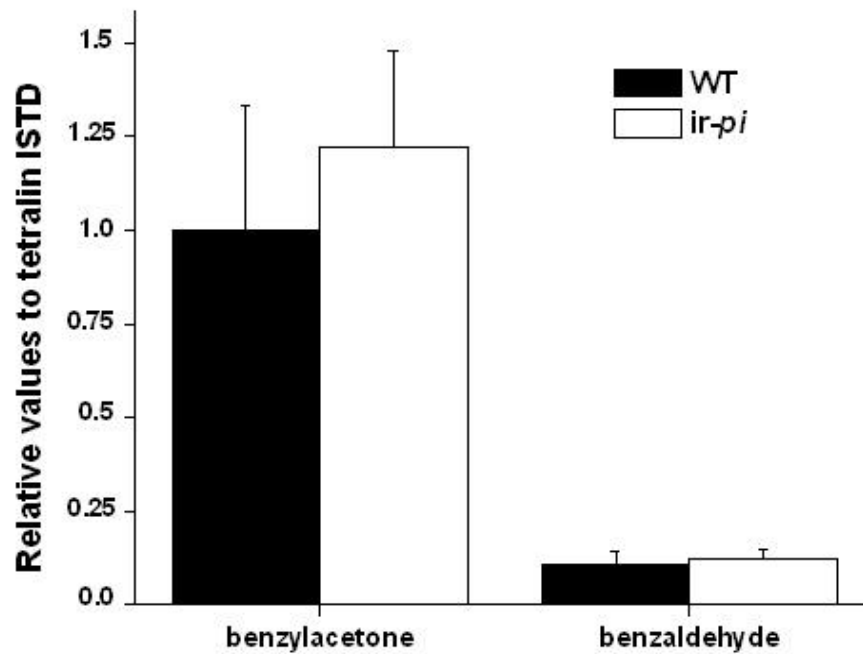

**Supplemental Figure S2:** Volatile organic compounds (VOCs) released from individual flowers of plants growing in the field plot at Lytle Ranch Preserve (Utah) from WT and *ir-pi* *N. attenuata* plants. Values are mean ( $\pm$  SE) peak areas in relation to the internal standard tetralin, of six to seven individual flowers from different plants for the two most abundant floral VOCs released from flowers during the night. All other minor floral VOC constituents ( $\alpha$ -pinene,  $\beta$ -pinene, D-limonene, ethylbenzoate, benzylalcohol and  $\beta$ -myrcene) trapped also did not differ significantly between the two genotypes (Student's t-test;  $p > 0.05$ ).

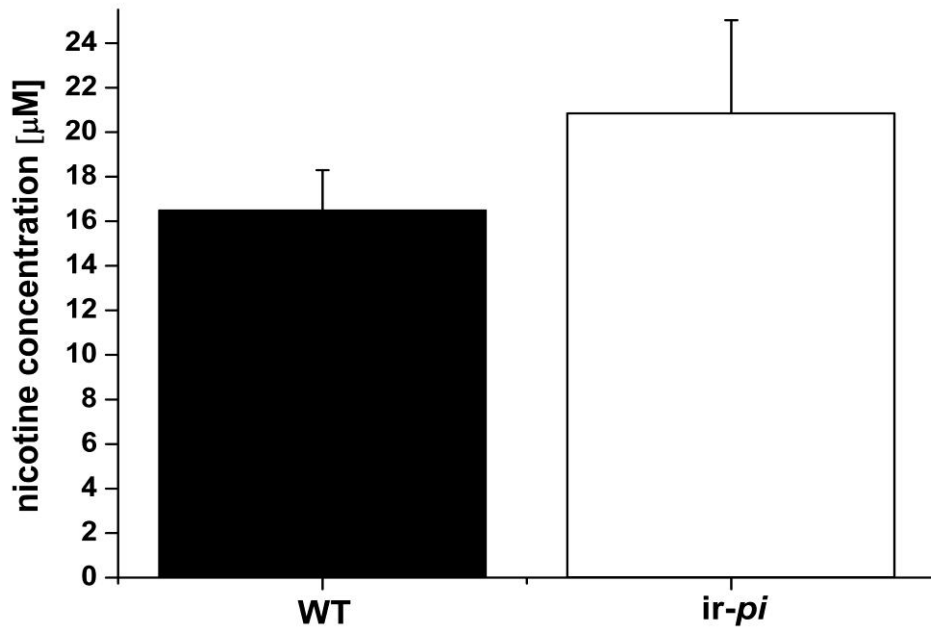

**Supplemental Figure S3: Nicotine concentration in nectar**

Mean ( $\pm$ SE) concentration of nicotine in nectar of flowers from *N. attenuata* wild-type plants (WT) and plants silenced in proteinase inhibitors (*ir-pi*) did not differ (Student's t-test;  $p > 0.05$ ). Nicotine was measured with a Bruker-MicroToF LC-MS in relation to internal standard (nicotine- $D_3$ ).

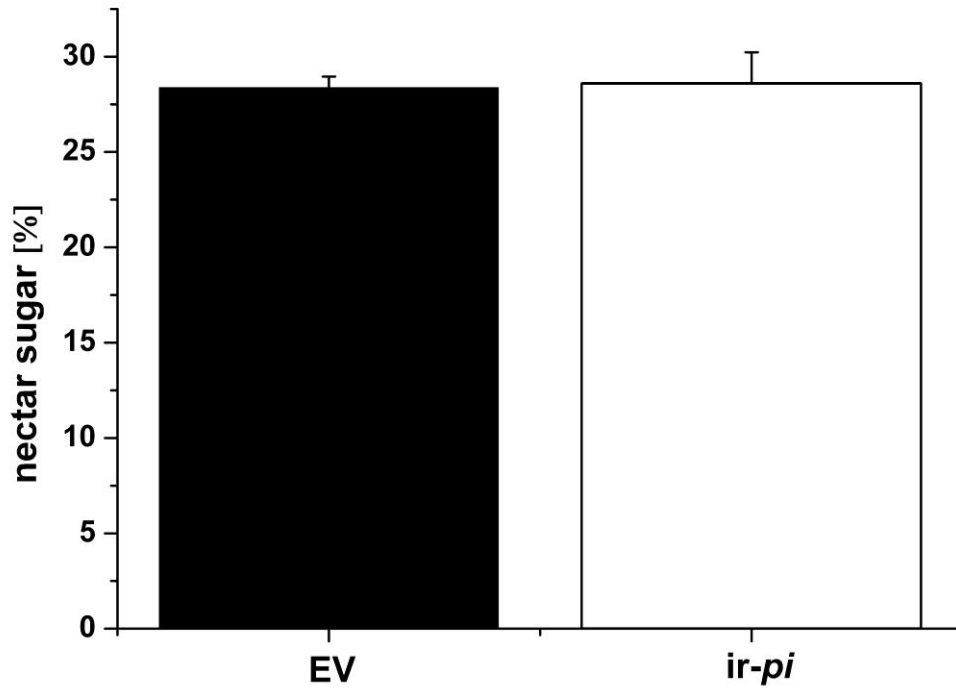

**Supplemental Figure S4:** Nectar sugar concentration in field-grown plants

Mean ( $\pm$ SE) nectar sugar concentration in *N. attenuata* empty-vector plants (EV), and plants silenced in proteinase inhibitors (*ir-pi*). Nectar sugar concentration was measured from mesh-bagged flowers that had opened the previous night between 6:00 p.m. and 7:30 a.m. in 2007 field season. No differences between the lines were found (Student's t-test;  $p > 0.05$ ).

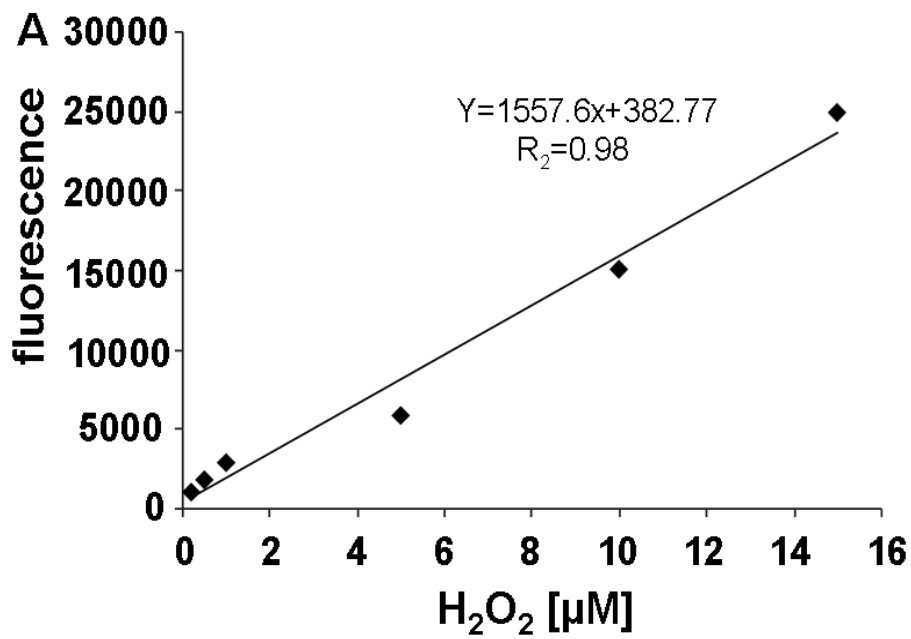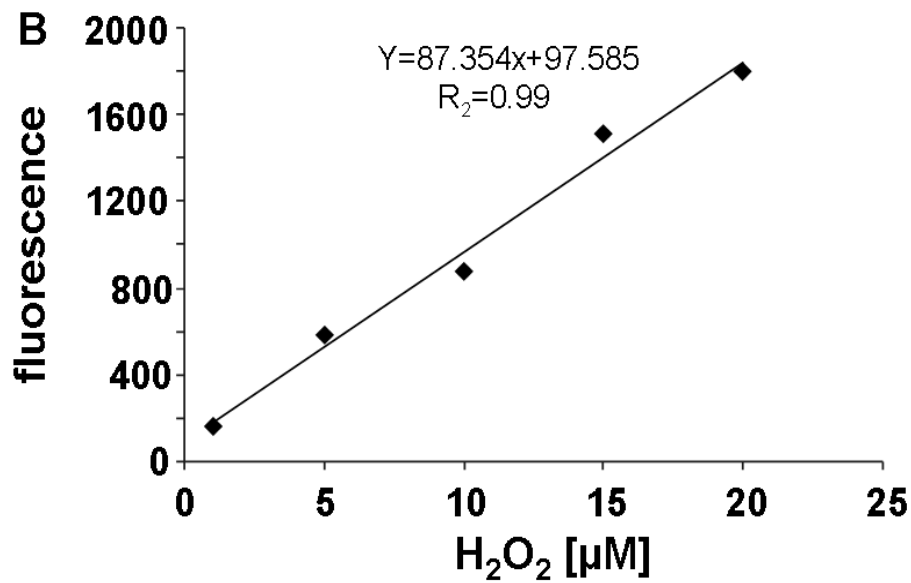

**Supplemental Figure S5:** Hydrogen peroxide standard curves using (A) amplex red hydrogen peroxide/peroxidase assay, (B) luminol chemiluminescence assay.

**Supplemental Table I. Protein spots identified with LC-MS/MS**

Mass spectrometric identification of protein spots with differential accumulation after silencing TPI in *N. attenuata*, using fragment spectral searches in UniProt non-redundant (<= 100%) databases (www.uniprot.org), and MS-Blast similarity search from the generated *de novo* peptide sequences.

| Spot N° | Accession N° | Name of protein                                                                           | Protein identification data                                                                                                                                                                                                                                                                                                                                                                     |                                                                                                                                                                                                                                                                                                                                                                                                                                                                    |
|---------|--------------|-------------------------------------------------------------------------------------------|-------------------------------------------------------------------------------------------------------------------------------------------------------------------------------------------------------------------------------------------------------------------------------------------------------------------------------------------------------------------------------------------------|--------------------------------------------------------------------------------------------------------------------------------------------------------------------------------------------------------------------------------------------------------------------------------------------------------------------------------------------------------------------------------------------------------------------------------------------------------------------|
|         |              |                                                                                           | Peptide Sequence                                                                                                                                                                                                                                                                                                                                                                                | Protein sequence                                                                                                                                                                                                                                                                                                                                                                                                                                                   |
| 1       | Q01M83       | H0622G10.1 protein<br><br>From: <i>Oryza sativa</i>                                       | Pep1: (-) LESPLVDLELR (-)<br>Pep2: (-) AEVVSLNGLLQK (-)<br>Pep3: (-) EAVVSLNGLLQK (-)<br>Pep4: (-) EAVVSLNGLLQK (-)<br>Pep5: (-) TVSPATLNSR (-)<br>Pep6: (-) <u>ASCGGTACVNSFGD</u><br><u>EQLAVDMLADK</u> (-)<br>Pep7: (-) NAYWTLELYGTTK<br>NDTKYLAGQ (-)<br>Pep8: (-) NAYWTLELRNLTTK<br>NDTKYLAGQ (-)<br>Pep9: (-) NAYWTLELRNLTTK<br>NDTKYLAGQ (-)                                              | METVAAASYTRGAATRSFACCAAMSF<br>QSYRPKAARPPSTFYGESLRVNTARSL<br>PSGRQSKAASRAALSTRCEIGDSLSEEF<br>LTKATPDKNLIRLLICMGEMRTISFK<br>VRTASCGGTACVNSFGDEQLAVDMLAD<br>KLLFEALEYSHVCKYACSEEVPELQDM<br>GGPVDGGFSAVDFPLDGSSIVDTNFTV<br>GTIFGVWPGDKLTGVTGGDQVAAAMGI<br>YGPRTTYIIALKDCPGTHEFLLLDGEGK<br>WQHVKDTTITIGEGKMFSPGNLRATFDN<br>PEYDKLINYYVKEKYTLRYTGGMVPDV<br>NQIIVKEKGIFTNVTSPTAKAKLRLLF<br>EVAPLGFLEKAGGYSSDGKQSVLDKV<br>INNLDETRQVAYGSKNEIRFEETLYG<br>SSRLTAGATVGAAA    |
| 2       | Q8WJ47       | Ribulose biphosphate<br>carboxylase large chain<br><br>From: <i>Polysiphonia japonica</i> | Pep1: (-) AEVVSLNGLLQK (-)<br>Pep2: (-) AEVVSLNGLLQK (-)<br>Pep3: (-) VATVSLPR (-)<br>Pep4: (-) LSSPATLNSR (-)<br>Pep5: (-) SLSPATLNSR (-)<br>Pep6: (-) TVSPATLNSR (-)<br>Pep7: (-) VPGVSLPR (-)<br>Pep8: (-) <u>GHYMNITAATMEE</u><br><u>MYER</u> (-)<br>Pep9: (-) WNSTNSLSGSHSLG<br>GSTYGFSSH (-)<br>Pep10: (-) WNSTGGSLSAPLS<br>LGGSTYGFSSH (-)<br>Pep11: (-) WNSTNSLSAPLSLG<br>GSTYGFSSH (-) | WTVVWTDLLTACDLYRAKAYKVDVAVN<br>TSDQYFAYIAYDIDLFEBSIANLTAS<br>IIGNVFGFKAVKALRLEDMRXXXXXXXX<br>XXXXXXXXXXXXXXXXXXXXXXXXXXXX<br>XXXXXXXXXXXXXXXXXXXXXXXXXXXX<br>XXXXXXXXXXXXXXXXXXXXXXXXXXXXNR<br>SIAATGEVKGHYMNITAATMEEMYERA<br>EFGKQIGTIIVMIDLVIQYTAIQTMAV<br>WARKNDMILHLHRAGNSTYSRQKIHGM<br>NFRVICKWMMRAGVDHIHAGTVVVGKLE<br>GDPLMIKGFYNTLLETHLDINLPQGIF<br>FQQDWESLRKVAVPVSAGGIHCQMHL<br>LDYLGNDVVLQFGGGTIGHPDGIQAGA<br>TANRVALESVMVIARNEGRDYVAEGPQI<br>LRDAAKTCGP |
| 3       | Q84UV8       | Nectarin-II<br><br>From: <i>Nicotiana langsdorffii</i><br>× <i>Nicotiana sanderae</i>     | Pep1: (-) <u>A</u> EVVSNLGLLQK (-)<br>Pep2: (-) EAVVSLNGLLQK (-)<br>Pep3: (-) EAVVSNLGLLQK (-)<br>Pep4: (-) TLLDLGWK (-)<br>Pep5: (-) VATVTVPR (-)<br>Pep6: (-) TLLDTPSWK (-)<br>Pep7: (-) VATVSLPR (-)<br>Pep8: (-) ALGTLDLPNQK (-)<br>Pep9: (-) LAGTLDLPNQK (-)                                                                                                                               | MRMAAITKMLFISFLFSSVFLARSGE<br>VDDESEFSYDEKSENGPANWGNIRPDW<br>KECSGKLQSPIDIFDLR <u>A</u> EVVSNLRL<br><u>Q</u> KDYKPSNATLLNRGHDIMLRLLDDGGY<br>LKINETQYQLKQLHWHTPSEHTINGER<br>FNLEAHLVHESNNGKVVVIGIVYEIGL<br>WDPDFLSMIENDLKVPANKKGIERGIG<br>IIDPNQIKLDGKKYFRYIGSLTTPPCT<br>EGVWVIIDRVKTVTRRQIKLQEAHV<br>DGFETNARPTQPENERYINSTYHSFGI<br>EKQQ                                                                                                                           |

**Protein identification data**

| Spot N° | Accession N° | Name of protein                                                                       | Peptide Sequence                                                                                                                                                                                                                                                                                                                                                                       | Protein sequence                                                                                                                                                                                                                                                                                                             |
|---------|--------------|---------------------------------------------------------------------------------------|----------------------------------------------------------------------------------------------------------------------------------------------------------------------------------------------------------------------------------------------------------------------------------------------------------------------------------------------------------------------------------------|------------------------------------------------------------------------------------------------------------------------------------------------------------------------------------------------------------------------------------------------------------------------------------------------------------------------------|
| 5       | AAO85482.1   | Nectarin-II<br><br>From: <i>Nicotiana langsdorffii</i><br>× <i>Nicotiana sanderae</i> | Pep1: (-) <u>EAVVSNLGLLQK</u> (-)<br>Pep2: (-) AEVVSNLGLLQK (-)<br>Pep3: (-) EAVVSNLGLLQK (-)<br>Pep4: (-) LESPLQLNTRL (-)<br>Pep5: (-) <u>ALGTLDPNQLK</u> (-)<br>Pep6: (-) LAGTLDPNQLK (-)<br>Pep7: (-) LESPLQVQTLR (-)<br>Pep8: (-) NETLQYELPVPNE<br>TQLPHGQ (-)<br>Pep9: (-) NETLQYELPVPNE<br>TKLPHGQ (-)<br>Pep10: (-) NETGALYELPVPN<br>ETQLPHGQ (-)<br>Pep11: (-) LESPLNLQTLR (-) | MRMAAITKMLFISFLFLSSVFLARS<br>GEVDDSESEFSYDEKSENGPANWGN<br>RPDWKECSGKLQSPIDIFDLRAEVV<br><u>SNLRILQKDYKPSNATLLNRGHDIM</u><br>LRLDDGGYKINETQYQLQLHWHT<br>PSEHTINGERFNLEAHLVHESNNGK<br>FVVGIVVEIGLWDPDFLSMIENDL<br>KVPANKKGIERGIGIIDPNQIKLDG<br>KKYFRYIGSLTTPPCTEGVWVIDR<br>KVKTVTRRQIKLLQEAVHDFETNA<br>RPTQPENERYINSTYHSFGIEKQQ |
| 32      | Q84UV8       | Nectarin-II<br><br>From: <i>Nicotiana langsdorffii</i><br>× <i>Nicotiana sanderae</i> | Pep1: (-) <u>KNGVSNLGLLQK</u> (-)<br>Pep2: (-) NKGVSNLGLLQK (-)<br>Pep3: (-) <u>ALGTLDPNQLK</u> (-)<br>Pep4: (-) LAGTLDPNQLK (-)<br>Pep5: (-) LAGTLDPPGQQLK (-)<br>Pep6: (-) LESPLAKQELR (-)<br>Pep7: (-) NPDLEYGALPT<br>ALGTLDPNQLK (-)<br>Pep8: (-) LESPLANLLDAK (-)<br>Pep9: (-) EASPATLNSR (-)                                                                                     | MRMAAITKMLFISFLFLSSVFLARS<br>GEVDDSESEFSYDEKSENGPANWGN<br>RPDWKECSGKLQSPIDIFDLRAEVV<br><u>SNLRILQKDYKPSNATLLNRGHDIM</u><br>LRLDDGGYKINETQYQLQLHWHT<br>PSEHTINGERFNLEAHLVHESNNGK<br>FVVGIVVEIGLWDPDFLSMIENDL<br>KVPANKKGIERGIGIIDPNQIKLDG<br>KKYFRYIGSLTTPPCTEGVWVIDR<br>KVKTVTRRQIKLLQEAVHDFETNA<br>RPTQPENERYINSTYHSFGIEKQQ |
| 35      | Q84UV8       | Nectarin-II<br><br>From: <i>Nicotiana langsdorffii</i><br>× <i>Nicotiana sanderae</i> | Pep1: (-) <u>AEVVSIVANLQK</u> (-)<br>Pep2: (-) EAVVSNLGLLQK (-)<br>Pep3: (-) EAVVSLVANLQK (-)<br>Pep4: (-) TVSPATLNSR (-)<br>Pep5: (-) VGPVSLPR (-)<br>Pep6: (-) VGPVSLPR (-)<br>Pep7: (-) GSFEVDPQLPT<br>LNETQYQLK (-)<br>Pep8: (-) GSFEVPELPTLN<br>ETQYQLK (-)<br>Pep9: (-) SGFEVPELPTLNET<br>QYQLK (-)                                                                              | MRMAAITKMLFISFLFLSSVFLARS<br>GEVDDSESEFSYDEKSENGPANWGN<br>RPDWKECSGKLQSPIDIFDLRAEVV<br><u>SNLRILQKDYKPSNATLLNRGHDIM</u><br>LRLDDGGYKINETQYQLQLHWHT<br>PSEHTINGERFNLEAHLVHESNNGK<br>FVVGIVVEIGLWDPDFLSMIENDL<br>KVPANKKGIERGIGIIDPNQIKLDG<br>KKYFRYIGSLTTPPCTEGVWVIDR<br>KVKTVTRRQIKLLQEAVHDFETNA<br>RPTQPENERYINSTYHSFGIEKQQ |

**Protein identification data**

| Spot N° | Accession N° | Name of protein                                                                                                             | Peptide Sequence                                                                                                                                                                                                                                                                                                                                                                                                                                     | Protein sequence                                                                                                                                                                                                                                                                                                                                                                                                                                                                                                                                                                                                                          |
|---------|--------------|-----------------------------------------------------------------------------------------------------------------------------|------------------------------------------------------------------------------------------------------------------------------------------------------------------------------------------------------------------------------------------------------------------------------------------------------------------------------------------------------------------------------------------------------------------------------------------------------|-------------------------------------------------------------------------------------------------------------------------------------------------------------------------------------------------------------------------------------------------------------------------------------------------------------------------------------------------------------------------------------------------------------------------------------------------------------------------------------------------------------------------------------------------------------------------------------------------------------------------------------------|
| 37      | Q9LDB9       | <p>Zeaxanthin epoxidase</p> <p>From: <i>Arabidopsis thaliana</i></p>                                                        | <p>Pep1: (-) <u>MQWYAFHEEPAG</u><br/>GADAPNGMK (-)</p> <p>Pep2: (-) AEVVSLNGLLQK (-)</p> <p>Pep3: (-) EAVVSLNGLLQK (-)</p> <p>Pep4: (-) EAVVSLNGLLQK (-)</p> <p>Pep5: (-) SLSPAFLDVP (-)</p> <p>Pep6: (-) VTSPAFLDVP (-)</p> <p>Pep7: (-) QEFIAHLRR (-)</p>                                                                                                                                                                                          | <p>MGSTPFCYSINSPSKLDFTRTHVFSP</p> <p>VSKQFYLDLSSFSFGKGGVSGFRSRRA</p> <p>LLGVKAATALVEKEEKREAVTDKSKKS</p> <p>RVLVAGGGIGGLVFALAAKKKGFVVLV</p> <p>FEKDLSAMRGEKYGPIQIQSNALAA</p> <p>LEAIDIEVAEQVMEAGCITGDRINGLV</p> <p>DGISGTWYVKFDTFTPAGVTLGPVTRV</p> <p>ISRMTLQQILARAVGEDVIRNESNVVD</p> <p>FEDSGDKVTVVLENGQRYEGDLLVGAD</p> <p>GIWSKVRNNLFGRESEATYSGYTCYGTI</p> <p>ADFIPADIESVGYRVFLGHKQYFVSSD</p> <p>VGGGKMOWYAFHEEPAGGADAPNGMCK</p> <p>RLFEIFDGCNDVLDLLHATEEEAILR</p> <p>RDIYDRSPGFTWGKGRVTLGDSIHAM</p> <p>QPNMQGGCMAIEDSFQLALELDEAWK</p> <p>QSVETTPVDVVSLSLKRYEESRRLRVA</p> <p>IIHAMARMAAIMASTYKAYLGVGLGPL</p> <p>SFLTFRVPHPRVGGRRFFVD</p> |
| 38      | AAO85482.1   | <p>Nectarin-III<br/>(Containing Nectarin II)</p> <p>From: <i>Nicotiana langsdorffii</i><br/>× <i>Nicotiana sanderae</i></p> | <p>Pep1: (-) TWVLVPR (-)</p> <p>Pep2: (-) LESPLDLLLR (-)</p> <p>Pep3: (-) LESPLDLEVL (-)</p> <p>Pep4: (-) <u>LESPLDLLLR</u> (-)</p> <p>Pep5: (-) AVPTNTGLLR (-)</p> <p>Pep6: (-) EAVVSLNGLLQK (-)</p> <p>Pep7: (-) EAVVSLNGLLQK (-)</p> <p>Pep8: (-) <u>EAVVSLNGLLQK</u> (-)</p> <p>Pep9: (-) <u>ALGTLDPNOLK</u> (-)</p> <p>Pep10: (-) LAGTLDPNGALK (-)</p> <p>Pep11: (-) LAGTLDPNQLK (-)</p> <p>Pep12: (-) ANLLRVLLDQRAL<br/>TDAGYLGQATLLNR (-)</p> | <p>MRMAAITKMLFISFLFLSSVFLARSGE</p> <p>VDESEFSYDEKSENGPANWGNIRPDW</p> <p>KECSGKLOSPIIDIFDLRAEVVSNLRIL</p> <p>QKDYKPSNATLLNRGHDIMLRLLDDGGY</p> <p>LKINETQYQLQLHWHPTSEHTINGER</p> <p>FNLEAHLVHESNNGKFVVIIGVYEIGL</p> <p>WPDPFSLMIENDLKVPAKKGIERGIG</p> <p><u>IIDPNQIKLDGKKYFRYIGSLTTPPCT</u></p> <p>EGVWVIIDRVKTVTRRQIKLLQEAHV</p> <p>DGFETNARPTQPENERYINSTYHSFGI</p> <p>EKQQ</p>                                                                                                                                                                                                                                                            |



**Protein identification data**

| Spot N° | Accession N° | Name of protein                                                                       | Peptide Sequence                                                                                                                                                                                                                                                                                                                                                              | Protein sequence                                                                                                                                                                                                                                                                                                                                                                                                                                                                                                                                                                                                                      |
|---------|--------------|---------------------------------------------------------------------------------------|-------------------------------------------------------------------------------------------------------------------------------------------------------------------------------------------------------------------------------------------------------------------------------------------------------------------------------------------------------------------------------|---------------------------------------------------------------------------------------------------------------------------------------------------------------------------------------------------------------------------------------------------------------------------------------------------------------------------------------------------------------------------------------------------------------------------------------------------------------------------------------------------------------------------------------------------------------------------------------------------------------------------------------|
| 39      | Q2RAV0       | Calcium-dependent protein kinase<br><br>From: <i>Oryza sativa</i>                     | Pep1: (-) LATVVPEK (-)<br>Pep2: (-) VATVPVRT (-)<br>Pep3: (-) ALGTLDPNQLK (-)<br>Pep4: (-) TVSPATLNSR (-)<br>Pep5: (-) <u>AVAGDEAEPGTS</u><br><u>KAAPPSR</u> (-)<br>Pep6: (-) NALLTLLLLNRRW<br>DAGYQGLATLLNR (-)<br>Pep7: (-) NALTLLLLNRRW<br>DAGYQGLATLLNR (-)                                                                                                               | MGQCCTGGGKAVAGDEAEPGTSKAAPP<br>SRGTSSKNGSAKQQPCSPAFAKAAATEA<br>AAAASSSKKAPGPIGEVLERPMEEVRT<br>TYSIGKELGRGQFGVTHLCTHKATGEK<br>LACKTIAKRKLANKEDVDDVRREVQIM<br>HHLSGQPNIVDLRGAYEDKHNHVLVME<br>LCAGGELFDRI IARGHYTERAAAALLR<br>AIVGIVHTCHSMGVIHRDLKPENFLLL<br>SKGDDAPLKATDFGLSVFFKEGEVFRD<br>IVGSAYYIAPEVLKRKYGPEADIWSIG<br>VMLYIFLAGVPPFWAASENAIFTAILR<br>GQIDLASEPWPKISSGAKDLVRKMLNI<br>NPKERLTAQVLNHPWIKEDGDAPDVP<br>LDNVVLNRLKQFRAMNQFKKAALRIIA<br>GCLSEEEIKGLKEMFKNIDKDNSGTIT<br>LEELKNGLAKQGTKFSNEIEQLMEAA<br>DADNGIIDYEEFVTATVHMNKMDREE<br>HLYTAFQYFDKDNSGYITKEELEQALK<br>EQGLYDANEIKDVIDTADSNNDGRIDY<br>SEFVAMMRKSGCAEATNPKKRRDLV |
| 40      | Q84UV8       | Nectarin-II<br><br>From: <i>Nicotiana langsdorffii</i><br>× <i>Nicotiana sanderae</i> | Pep1: (-) QAAKSIVANGLAR (-)<br>Pep2: (-) LESPLDVELLR (-)<br>Pep3: (-) <u>LESPLDVLELR</u> (-)<br>Pep4: (-) LLYCQR (-)<br>Pep5: (-) AMFEPLGPSYRGPR (-)<br>Pep6: (-) LESPLQGSALLR (-)<br>Pep7: (-) TVSPATLNSR (-)<br>Pep8: (-) <u>ALGTLDPNOLK</u> (-)<br>Pep9: (-) LAGTLDPNQLK (-)<br>Pep10: (-) LASALDPNQLK (-)<br>Pep11: (-) AEVVS LNGLLQK (-)<br>Pep12: (-) EAVVSLNGLLGAK (-) | MRMAAITKMLFISFLFLSSVFLARSG<br>EVDDESEFSYDEKSENGPANWGNIRP<br>DWKECSGKLOSPIDIFDLRAEVVSNL<br>RILQKDYKPSNATLLNRGHDIMLRLD<br>DGGYLKINETQYQLKQLHWHPTSEHT<br>INGERFNLEAHLVHESNNGKFVVIGI<br>VYEIGLWDPFPLSMIENDLKVPAKK<br>GIERGIGIIDPNOIKLDGKKYFRYIG<br>SLTTPPCTEGVVWIIDRKKVTVTRRQ<br>IKLLQEAVHDGFETNARPTQPENERY<br>INSTYHSFGIEKQQ                                                                                                                                                                                                                                                                                                             |
| 42      | Q69KU5       | Putative uncharacterized protein.<br><br>From: <i>Oryza sativa</i>                    | Pep1: (-) MAAADTGGDNGGPTTP (-)<br>Pep2: (-) <u>DHGGAAAEGRQDLGK</u> (-)<br>Pep3: (-) AEVVS LNGLLQK (-)<br>Pep4: (-) EAVVSLNGLLQK (-)<br>Pep5: (-) EAVVSLNGLLQK (-)<br>Pep6: (-) TVSPATLNSR (-)                                                                                                                                                                                 | MARRLRARGQTTTGDGSASRWRAWG<br>AADGEKGEAVGILTEDGDGETTTG<br>RWPAAEKMAATGTGGDNGVPTTPD<br><u>HGGAAAEGRQDLGK</u> ILERLGREIGD<br>RSGEERWFETTTAVALGSTAESGR<br>LKTAAGGERGGARGGGVPEAERGNG<br>VEAGLRHGAAKPTVVADWRGGGWSG<br>GIGRPELAGKRWCTGARWGGV                                                                                                                                                                                                                                                                                                                                                                                                 |

**Protein identification data**

| Spot N° | Accession N° | Name of protein                                                                       | Peptide Sequence                                                                                                                                                                                                                                                                                                                                                                                                                                                                                                                                                                                    | Protein sequence                                                                                                                                                                                                                                                                                                                            |
|---------|--------------|---------------------------------------------------------------------------------------|-----------------------------------------------------------------------------------------------------------------------------------------------------------------------------------------------------------------------------------------------------------------------------------------------------------------------------------------------------------------------------------------------------------------------------------------------------------------------------------------------------------------------------------------------------------------------------------------------------|---------------------------------------------------------------------------------------------------------------------------------------------------------------------------------------------------------------------------------------------------------------------------------------------------------------------------------------------|
| 44      | Q84UV8       | Nectarin-II<br><br>From: <i>Nicotiana langsdorffii</i><br>× <i>Nicotiana sanderae</i> | Pep1: (-) <u>LESPLDV</u> ELLR (-)<br>Pep2: (-) AKDQESYPK (-)<br>Pep3: (-) <u>AEVVSLNGLLQK</u> (-)<br>Pep4: (-) EAVVSLNGLLGAK (-)<br>Pep5: (-) SLNNQFSATVFR (-)<br>Pep6: (-) <u>ALGTLDPNQLK</u> (-)<br>Pep7: (-) LAGTLDPNGALK (-)<br>Pep8: (-) NALTNALNRGYKCT<br><u>PSNATLLNR</u> (-)                                                                                                                                                                                                                                                                                                                | MRMAAITKMLFISFLFLSSVFLAR<br>SGEVDDESEFSYDEKSENGPANWG<br>NIRPDWKECSGKLOSPIDIFDLRA<br><u>EVVSNLRILQKDYKPSNATLLNRG</u><br>HDIMLRLLDDGGYLNINETQYQLKQ<br>LHWHTPSEHTINGERFNLEAHLVH<br>ESNNGKFVVIGIVYEIGLWDPDFL<br>SMIENDLKVPAKKGIERGIGIID<br><u>PNQIKLDGKKYFRYIGSLTTPPCT</u><br>EGVWIIDRKVKTVTRRQIKLLQE<br>AVHDGFETNARPTQPENERYINST<br>YHSFGIEKQQ |
| 54      | Q9SM34       | Germin-like protein<br><br>From: <i>Triticum aestivum</i>                             | Pep1: (-) <u>GMQLAQETIEK</u> MTSR (-)<br>Pep2: (-) LTPALNTLGLTLLR (-)<br>Pep3: (-) <u>ASDPPLSDDYLAK</u> (-)<br>Pep4: (-) TLPALNGLTLLR (-)<br>Pep5: (-) TLPALNTLGLTLLR (-)                                                                                                                                                                                                                                                                                                                                                                                                                           | MASSSFLLLAALLAVSWQATA<br>SDPSPLQDFCVADMNSPVRVNGF<br>VCKNPMEVNADDFKAAKNDKPK<br>MPNKVGSNVTLINVMOIAGLNTL<br><u>GISIARIDYAPLGNPPHHPRA</u><br>TEILTIVLEGTLYVGFVTSNQAP<br>NKNKFLSKVLNKGDVVFPVGLI<br>HFQFNPNPHQPAVAIAALSSQNP<br>GAITIANAVFGSDPPI SDDVLAK<br>AFQVEKNTIDYLQAQFWENNHY                                                                 |
| 55      | ACG47794.1   | Germin-like protein<br><br>From: <i>Zea mays</i>                                      | Pep1: (-) PDPNSNLGGTK (-)<br>Pep2: (-) PDPNSNVAGTK (-)<br>Pep3: (-) PDPNSNVQTK (-)<br>Pep4: (-) QVDLESADLDP (-)<br>Pep5: (-) <u>PALNTLGGKSPR</u> (-)<br>Pep6: (-) LPANYDGLYSVAVDAR (-)<br>Pep7: (-) MVLEDLR (-)<br>Pep8: (-) VMLEDLR (-)<br>Pep9: (-) VPYEDLR (-)<br>Pep10: (-) <u>ANGDLLVVFVFPQGH</u> (-)<br>Pep11: (-) NAGDLLVVFVFPQGH (-)<br>Pep12: (-) NALGDLVVFVFPQGH (-)<br>Pep13: (-) MVLEELR (-)<br>Pep14: (-) <u>ASDPPLSDDYLAK</u> (-)<br>Pep15: (-) TGDPPLSDDYLAK (-)<br>Pep16: (-) VMFEDKLR (-)<br>Pep17: (-) LTPALNGLTLLR (-)<br>Pep18: (-) TLPALNGLTLLR (-)<br>Pep19: (-) TYLEDKLR (-) | MAASSYFLLAAFLAVVASHATAS<br>DPSPLQDFCVADMHSPVKVNGFV<br>CKDSMAVTADDFKAAKNDKARD<br>TMKSKVGSNVTLINVIQLPGLNT<br><u>LGISLARIDYAPLGENPPHHPRA</u><br>ATEILTIVLEGTLYVGFVTSNPNK<br>LFAKVLNKGDVVFPQGLIHQFQF<br>NPVYNKPAVAIAALSSQNPVIT<br>IANAVFGSKPPI SDDVLAKAFQV<br>EKGTDWLQAQFWENNHY                                                                 |

**Protein identification data**

| Spot N° | Accession N° | Name of protein                                                                      | Protein identification data                                                                                                                                                                                                                                                                                                                                                                                                                                      |                                                                                                                                                                                                                                                                                                    |
|---------|--------------|--------------------------------------------------------------------------------------|------------------------------------------------------------------------------------------------------------------------------------------------------------------------------------------------------------------------------------------------------------------------------------------------------------------------------------------------------------------------------------------------------------------------------------------------------------------|----------------------------------------------------------------------------------------------------------------------------------------------------------------------------------------------------------------------------------------------------------------------------------------------------|
|         |              |                                                                                      | Peptide Sequence                                                                                                                                                                                                                                                                                                                                                                                                                                                 | Protein sequence                                                                                                                                                                                                                                                                                   |
| 57      | Q84PM0       | Germin-like protein<br><br>From: <i>Gossypioides kirkii</i>                          | Pep1: (-) LTPALNTLGLTLLR (-)<br>Pep2: (-) TLPALNGLTLLR (-)<br>Pep3: (-) <u>MVKLATANR</u> (-)<br>Pep4: (-) <u>LLNAGDVVFVFPQGH</u> (-)                                                                                                                                                                                                                                                                                                                             | PLQDFCVALNSTKHAVFVNGKLC<br>KDPK <u>LATAD</u> DFFFSGLDKPGNTS<br>NAVGSRVTFVNVDQI <u>PGLN</u> TL <u>LSI</u><br><u>SLVR</u> IDYAPNGGQNPPTHPRAT<br>EILVVTKGTLVGFITSNPDNRL<br>FTK <u>VLKTGDVVFV</u> PVGLIQQFN<br>IGKTNAIAFAGLSSQNPGVITIA<br>NAVFGSNPAINSEVLAKTFKLDK<br><br>KMA                           |
| 83      | Q94EG3       | Nectarin-I<br><br>From: <i>Nicotiana langsdorffii</i><br>× <i>Nicotiana sanderae</i> | Pep1: (-) LTPALNTLGLTLLR (-)<br>Pep2: (-) TLPALNGLTLLR (-)<br>Pep3: (-) TLPALNTLGLTLLR (-)<br>Pep4: (-) YPVEDLR (-)<br>Pep5: (-) FLVEDLR (-)<br>Pep6: (-) FVLEDLR (-)<br>Pep7: (-) PYLEDKLR (-)<br>Pep8: (K) GEVVFVPR (G)<br>Pep9: (-) FLEDKLR (-)<br>Pep10: (-) LFLEDKLR (-)                                                                                                                                                                                    | MAAFGINSKIFQSMEMAILFLLA<br>ISIDRYCFAADEDMLQDVCVADL<br>HSKVKVNGFPCKTNFTAADFSSL<br>AISKPGATNNKFGSVVTTANVEQ<br>V <u>PGLN</u> TL <u>GVSLAR</u> IDYAPGGINP<br>PHTHPRASEMVFVMEGELDVGFI<br>TTANVLVSKKII <u>KGEVVFVPRGL</u><br>VHFQKNGEVPAAVISAFNSQLP<br>GTQSIPIITLFGASPPVDDVLAQ<br>TFQINTEDVQQIKSKFAPVKKF |
| 84      | Q9SM34       | Germin-like protein<br><br>From: <i>Triticum aestivum</i>                            | Pep1: (-) <u>ASDPPLSDDYLAK</u> (-)<br>Pep2: (-) LTPALNTLGLTLLR (-)<br>Pep3: (-) TLPALNTLGLTLLR (-)<br>Pep4: (-) TLPALNTLGLTLLR (-)<br>Pep5: (-) MVLEDLR (-)<br>Pep6: (-) VMLEDLR (-)                                                                                                                                                                                                                                                                             | MASSSSFLLLAALLALVSWQATA<br>SDPSPLODFCVADMNSPVRVNGF<br>VCKNPMEVNADDFKAANLDPKPK<br>MPNKVGSNVTLINVMQIAGLNTL<br>GISIARIDYAPLQGNPPHHPRA<br>TEILTVLEGLTYVGFVTSNQAP<br>NKNKFLSKVLNKGDFVFPVGLI<br>HFQFNPNPQPAVAIAALSSQNP<br><u>GAITIANAVFGSDPPI</u> SDDVLAK<br>AFQVEKNTIDYLQAQFWENNHY                      |
| 86      | Q6YZB2       | Germin-like protein<br><br>From: <i>Oryza sativa</i>                                 | Pep1: (-) KLLGVTTLDVAR (-)<br>Pep2: (-) SGEVGLKVK (-)<br>Pep3: (-) VLLEKAACK (-)<br>Pep4: (-) KEATTAADVVELR (-)<br>Pep5: (-) EQLQSSSICPSR (-)<br>Pep6: (-) LLNADGVVFVFPQGH (-)<br>Pep7: (-) <u>LLNAGDVVFVFPAGGH</u> (-)<br>Pep8: (-) MVLEDLR (-)<br>Pep9: (-) VYPEDLR (-)<br>Pep10: (-) AVSLYEDSK (-)<br>Pep11: (-) SVALYEDSK (-)<br>Pep12: (-) <u>ASDPPLSDDYLAK</u> (-)<br>Pep13: (-) FGKVLVIDGK (-)<br>Pep14: (-) MVLEDKLR (-)<br>Pep15: (-) LTPALNTWLLLLK (-) | MASSSSFLLLAALLALVSWQAT<br>ASDPSPLQDFCVADMNSPVRVN<br>GFVCKNPMEVNADDFKAANLD<br>KPKMPNKVGSNVTLINVMQIAG<br>LNTLGISIARIDYAPLQGNPPH<br>THPRATEILTVLEGLTYVGFVT<br>SNQPAPNKNKFLSKVLNKGDFV<br><u>VFPVGLIHFQFNPNPQPAVAI</u><br>AALSSQNPGAITIANAVFGSDP<br><u>PISDDVLAKAFQVEKNTIDYLQ</u><br>AQFWENNHY          |

**Protein identification data**

| Spot<br>N° | Accession<br>N° | Name of protein                                              | Protein identification data                                                                                                                                                                                                                                                                                                                                                                                                                                      |                                                                                                                                                                                                                |
|------------|-----------------|--------------------------------------------------------------|------------------------------------------------------------------------------------------------------------------------------------------------------------------------------------------------------------------------------------------------------------------------------------------------------------------------------------------------------------------------------------------------------------------------------------------------------------------|----------------------------------------------------------------------------------------------------------------------------------------------------------------------------------------------------------------|
|            |                 |                                                              | Peptide Sequence                                                                                                                                                                                                                                                                                                                                                                                                                                                 | Protein sequence                                                                                                                                                                                               |
| 89         | AAB51582.1      | Germin-like protein<br><br>From: <i>Arabidopsis thaliana</i> | Pep1: (-) MSVEI PPSDDFRAMK (-)<br>Pep2: (-) GGSPSSFSGLNMVSR (-)<br>Pep3: (-) LSFKN SPENR (-)<br>Pep4: (-) EQLQSSSICPSR (-)<br>Pep5: (-) LTPALNTLGLTLLR (-)<br>Pep6: (-) TLPALNTLGLLTLR (-)<br>Pep7: (-) TLPALNTLGLTLLR (-)<br>Pep8: (-) MVLEDLR (-)<br>Pep9: (-) PYVEDLR (-)<br>Pep10: (-) YPVEDLR (-)<br>Pep11: (-) NSGGGGHSGGTECI<br>MGDSK (-)<br>Pep12: (-) VLPNSASGGGLK (-)<br>Pep13: (-) MVLEDKLR (-)<br>Pep14: (-) TYKNDKLR (-)<br>Pep15: (-) YTKNDKLR (-) | PKRVDAKDFFFSGLNMPGNTN<br>NQVGSNVTTVNVDQIPGLNTM<br>GISLVRIDYAPHGQNPPTHHP<br>RGSEILVLVEGTLYVGFVSSN<br>QDNNRLEFAKVLHPGDVVFVPI<br>GMIHFQVNVGKIPAVAFAGLS<br>SQNAGVITIANTVFGSNPPIY<br>PELLARAFQLDASVVKELQAK<br>FGS I |

**Supplemental Table II. Protein spots identified with LC-MS/MS**

Mass spectrometric identification of protein spots, common in WT and *ir-pi N. attenuata* nectar, in *N. attenuata*, using fragment spectral searches in UniProt non-redundant ( $\leq 100\%$ ) databases (www.uniprot.org), and MS-Blast similarity search from the generated *de novo* peptide sequences.

| Spot N°  | Accession N° | Name of protein                                                                   | Protein identification data                                                                                                                                                                                                                                                                                                                                                                                                                                                                                  |                                                                                                                                                                                                                                                                                                                                                                                                                              |
|----------|--------------|-----------------------------------------------------------------------------------|--------------------------------------------------------------------------------------------------------------------------------------------------------------------------------------------------------------------------------------------------------------------------------------------------------------------------------------------------------------------------------------------------------------------------------------------------------------------------------------------------------------|------------------------------------------------------------------------------------------------------------------------------------------------------------------------------------------------------------------------------------------------------------------------------------------------------------------------------------------------------------------------------------------------------------------------------|
|          |              |                                                                                   | Peptide Sequence                                                                                                                                                                                                                                                                                                                                                                                                                                                                                             | Protein sequence                                                                                                                                                                                                                                                                                                                                                                                                             |
| <b>A</b> | Q401N7       | Aspartic proteinase<br>From: <i>Triticum aestivum</i>                             | Pep1: (-) AEVVSNLGLLQK (-)<br>Pep2: (-) EAVVSNLGLLQK (-)<br>Pep3: (-) EAVVSNLLGLLQK (-)<br>Pep4: (-) ALGTLDPNQLK (-)<br>Pep5: (-) LAGTLDPNQLK (-)<br>Pep6: (-) TVSPATLNSR (-)<br>Pep7: (-) <u>VGEGTATQCISGFTAM</u><br><u>DIPPPR</u> (-)                                                                                                                                                                                                                                                                      | VAKFDGILGLGFKEISVGKAVPVWYNM<br>VEQGLISDPVFSFWLNRHADDEGEGGE<br>IIFGGMDPKHYVGEHTYVPATQKGYWQ<br>FDMGDVLVGGKSTGFCAGGCAAIADSG<br>TSLLAGPTAIITEINEKIGAAVVSQGE<br>CKTIVSQYGGQIILLDLAETQPKKVCSS<br>QVGLCTFDGTRGVSAGIRSVVDPEVK<br>SNGLHTDPMCSACEMAVVMMQNQLAQN<br>KTQDLILDYVNLNRLPSPMGESAVD<br>CASLGSPDIEFTISGKKFALKPEEYI<br>LKVGEAAAQCISGFTAMDIPPPRGPL<br>WILGDVFMGPYHTVFDYKGLRVGFAKA                                                 |
| <b>B</b> | Q5ZDT4       | Putative HGA6<br>From: <i>Oryza sativa</i>                                        | Pep1: (-) LESPLDAVKSPK (-)<br>Pep2: (-) LESPLDAVKSPK (-)<br>Pep3: (-) SGKGPLDAVKSPK (-)<br>Pep4: (-) TVSPATLNSR (-)<br>Pep5: (-) ALGTLDPNGALK (-)<br>Pep6: (-) AEVVSNLGLLQK (-)<br>Pep7: (-) EAVVSNLGLLQK (-)<br>Pep8: (-) <u>NAAGFMNASSDGSNO</u><br><u>QQLDLDRDAMSR</u> (-)<br>Pep9: (-) HYQLFSDSDFGGTLR<br>LGFSNEQNNGK (-)<br>Pep10: (-) HYQLFSDSDFGGTLR<br>LGFSNHFTTSP (-)                                                                                                                                | MEGGGKAGYSYGGHHHQDAKLLKNLSR<br>VEPRRFGGLVAGFLIVTCAYFSTAKFD<br>AIHIAMSTPAHLLLLLTHLHAYLCISL<br>LSPWILAVSSPAKNAAGFMNASSDGSNO<br><u>QQLDLDRDAMSR</u> EGSKAQVLDTDGDDKI<br>SSLGPDLGHNASALEGKKKDETFKADSG<br>DASVSASTDEALAKDDAIVGAVLPPLS<br>SEEPNITQDSVLEDEELKQVETAPATT<br>NPSPEKSSNNGSSPSVVPSPATLPVQQ<br>IPPTQBEAKDPPAQQIPAVPEAKVFPVQQ<br>IPTFPVVKTEAAPRRKEWKPLCDLWSNR<br>RIDWCELDGDVVRVAGANGTVSLVAPPGP<br>ADERTFRAESWHIKPYPRKADPNA |
| <b>C</b> | Q84UV8       | Nectarin-II<br>From: <i>Nicotiana langsdorffii</i><br>× <i>Nicotiana sanderae</i> | Pep1: (-) LESPLDVLQNR (-)<br>Pep2: (-) FCNYHGSFDGDN<br>YNIGSQMR (-)<br>Pep3: (-) ELSPLDVLELR (-)<br>Pep4: (-) <u>LESPLDVLELR</u> (-)<br>Pep5: (-) TVSPATLNSR (-)<br>Pep6: (-) AEVVSNLGLLQK (-)<br>Pep7: (-) <u>EAVVSNLGLLQK</u> (-)<br>Pep8: (-) LLVLVFWVHR (-)<br>Pep9: (-) LLVLVFWVHR (-)<br>Pep10: (-) ANEGLGFNSFSLHF<br>LGYADDAGLSEDGK (-)<br>Pep11: (-) ANEGLGFNSFSLH<br>FLGYADDAGLSEDGK (-)<br>Pep12: (-) HFSLGFNSEELLF<br>LGFSPGMGLSEDGK (-)<br>Pep13: (-) <u>NALMLEGKK</u> TKKDSWL<br>CMRATLLGGR (-) | MRMAAITKMLFISFLSFLSFLARSGE<br>VDESEFSYDEKSENGPANWGNIRPDW<br>KECSGK <u>LQSPIDIFDLRAEVVSNLRLL</u><br><u>QKDYKPSNATLLNRGHIMLRLLDDGGY</u><br>LKINETQYQLKQLHWHHTPSEHTINGER<br>FNLEAHLVHESNNGKFFVIGIVYEIGL<br>WDPDFLSMIENDLKVANKKGIERGIG<br>IIDPNQIKLDGKKYFRYIGSLTTPPCT<br>EGVWVIIDRVKVTTRQIKLLQEAHV<br>DGFETNARPTQPENERYINSTYHSFGI<br>0EKQQ                                                                                       |

**Protein identification data**

| Spot<br>N° | Accession<br>N° | Name of protein                                                                       | Protein identification data                                                                                                                                                                                                                                                                                                                                                                                           |                                                                                                                                                                                                                                                                                                                                           |
|------------|-----------------|---------------------------------------------------------------------------------------|-----------------------------------------------------------------------------------------------------------------------------------------------------------------------------------------------------------------------------------------------------------------------------------------------------------------------------------------------------------------------------------------------------------------------|-------------------------------------------------------------------------------------------------------------------------------------------------------------------------------------------------------------------------------------------------------------------------------------------------------------------------------------------|
|            |                 |                                                                                       | Peptide Sequence                                                                                                                                                                                                                                                                                                                                                                                                      | Protein sequence                                                                                                                                                                                                                                                                                                                          |
| <b>D</b>   | Q2KMD9          | Glyceraldehyde-3-phosphate<br>dehydrogenase<br><br>From: <i>Nicotiana tabacum</i>     | Pep1: (-) <u>LEKEATYDDIK</u> (-)<br>Pep2: (-) LSSPAQLSSR (-)<br>Pep3: (-) LSSPAVAASSR (-)<br>Pep4: (-) ALGTLDPNQLK (-)<br>Pep5: (-) LAGTLDPNGALK (-)<br>Pep6: (-) LAGTLDPNQLK (-)                                                                                                                                                                                                                                     | GLMTTVHSITATQKTVDGPSMK<br>DWRGGRAASFNIIPSSSTGAACA<br>VGKVLPLVNLGKLTGMAFRVPTV<br>DVSVDLTVR <u>LEKEATYDDIKA</u><br>AIKEASQGKLGILGYTEDDVV<br>STDFVGDSRSSIFD                                                                                                                                                                                  |
| <b>E</b>   | Q84UV8          | Nectarin-II<br><br>From: <i>Nicotiana langsdorffii</i><br>× <i>Nicotiana sanderae</i> | Pep1: (-) <u>ELSPLDVLELR</u> (-)<br>Pep2: (-) <u>LESPLDVLELR</u> (-)<br>Pep3: (-) <u>LESPLDVLELR</u> (-)<br>Pep4: (-) <u>AEVVSILVANLQK</u> (-)<br>Pep5: (-) EAVVSLVANLAGK (-)<br>Pep6: (-) <u>ALGTLDPNQLK</u> (-)<br>Pep7: (-) ALSALDPNQLK (-)<br>Pep8: (-) LAGTLDPNQLK (-)<br>Pep9: (-) NAAAYTDLQLSVYHTN<br>LETQYQLK (-)<br>Pep10: (-) NASFNKSQLFTTHTR<br>AETQYQLK (-)<br>Pep11: (-) NASFLCLQLSVYH<br>TARETQYQLK (-) | MRMAAITKMLFISFLFLSSVFL<br>ARSGEVDESEFSYDEKSENGP<br>ANWGNIRPDWKECSGKLOSPID<br><u>IFDLRAEVVSNLRILQKDYKPS</u><br>NATLLNRGHDIMLRLLDDGGYLYK<br>INETQYQLKQLHWHTPSEHTIN<br>GERFNLEAHLVHESNNGKFVVI<br>GIVYEIGLWPDPLFSMIENDLK<br>VPANKKGIERGIGIIDPNQIKL<br>DGKKYFRYIGSLTTPPCTEGVV<br>WIIDRVKTVTRRQIKLLQEAV<br>HDGFETNARPTQPENERYINST<br>YHSFGIEKQQ |
| <b>F</b>   | Q84UV8          | Nectarin-II<br><br>From: <i>Nicotiana langsdorffii</i><br>× <i>Nicotiana sanderae</i> | Pep1: (-) EIQAGCSESLPGS<br>SKSSWK (-)<br>Pep2: (-) ELSPLDVLELR (-)<br>Pep3: (-) <u>LESPLDVLELR</u> (-)<br>Pep4: (-) <u>AEVVSILNGLLQK</u> (-)<br>Pep5: (-) EAVVSLNGLLGAK (-)<br>Pep6: (-) LESPLLELLR (-)<br>Pep7: (-) <u>ALGTLDPNQLK</u> (-)<br>Pep8: (-) LAGTLDPNGALK (-)<br>Pep9: (-) LAGTLDPNQLK (-)                                                                                                                | MRMAAITKMLFISFLFLSSVFL<br>ARSGEVDESEFSYDEKSENGP<br>ANWGNIRPDWKECSGKLOSPID<br><u>IFDLRAEVVSNLRILQKDYKPS</u><br>NATLLNRGHDIMLRLLDDGGYLYK<br>INETQYQLKQLHWHTPSEHTIN<br>GERFNLEAHLVHESNNGKFVVI<br>GIVYEIGLWPDPLFSMIENDLK<br>VPANKKGIERGIGIIDPNQIKL<br>DGKKYFRYIGSLTTPPCTEGVV<br>WIIDRVKTVTRRQIKLLQEAV<br>HDGFETNARPTQPENERYINST<br>YHSFGIEKQQ |

**Protein identification data**

| Spot N°  | Accession N° | Name of protein                                                                       | Peptide Sequence                                                                                                                                                                                                                                                                                                                                                                   | Protein sequence                                                                                                                                                                                                                                                                                                                   |
|----------|--------------|---------------------------------------------------------------------------------------|------------------------------------------------------------------------------------------------------------------------------------------------------------------------------------------------------------------------------------------------------------------------------------------------------------------------------------------------------------------------------------|------------------------------------------------------------------------------------------------------------------------------------------------------------------------------------------------------------------------------------------------------------------------------------------------------------------------------------|
| <b>G</b> | Q84UV8       | Nectarin-II<br><br>From: <i>Nicotiana langsdorffii</i><br>× <i>Nicotiana sanderae</i> | Pep1: (-) LESPLSDLLLSP (-)<br>Pep2: (-) LESPLFLALPSP (-)<br>Pep3: (-) <u>AEVVSNLGLLQK</u> (-)<br>Pep4: (-) EAVVSLVANLQK (-)<br>Pep5: (-) <u>ALGTLDPNQLK</u> (-)<br>Pep6: (-) LAGTLDPNGALK (-)                                                                                                                                                                                      | MRMAAITKMLFISFLFLSSVFLARSG<br>EVDDSESEFSYDEKSENGPANWGNIRP<br>DWKECSGKLSQSPIDIFDLRAEVVSNL<br><u>RILQKDYKPSNATLLNRGHDIMLRLD</u><br>DGGYLKINETQYQLKQLHWHHTPSEHT<br>INGERFNLAEHLVHESNNGKFVVI<br>VYEIGLWDPFPLSMIENDLKVPANKK<br>GIERGIGIIDPNQIKLDGKKYFRYIG<br>SLTTPPCTEGVWVIIDRVKVTVTRRQ<br>IKLLQEAVHDGFETNARPTQPENERY<br>INSTYHSFGIEKQQ |
| <b>H</b> | Q84UV8       | Nectarin-II<br><br>From: <i>Nicotiana langsdorffii</i><br>× <i>Nicotiana sanderae</i> | Pep1: (-) NSSPAVESQK (-)<br>Pep2: (-) LESPLQGDRLR (-)<br>Pep3: (-) LESPLQGRDLR (-)<br>Pep4: (-) <u>LESPLDLLDLR</u> (-)<br>Pep5: (-) SNVVSLLGAGLK (-)<br>Pep6: (-) SNVVSLLQANK (-)<br>Pep7: (-) SNVVSVLQAGLK (-)<br>Pep8: (-) AEVVSLNGLLQAK (-)<br>Pep9: (-) <u>AEVVSLLGLLQK</u> (-)<br>Pep10: (-) AYIQQLTSR (-)<br>Pep11: (-) <u>ALGTLDPNQLK</u> (-)<br>Pep12: (-) LASALDPNQLK (-) | MRMAAITKMLFISFLFLSSVFLARSG<br>EVDDSESEFSYDEKSENGPANWGNIRP<br>DWKECSGKLSQSPIDIFDLRAEVVSNL<br><u>RILQKDYKPSNATLLNRGHDIMLRLD</u><br>DGGYLKINETQYQLKQLHWHHTPSEHT<br>INGERFNLAEHLVHESNNGKFVVI<br>VYEIGLWDPFPLSMIENDLKVPANKK<br>GIERGIGIIDPNQIKLDGKKYFRYIG<br>SLTTPPCTEGVWVIIDRVKVTVTRRQ<br>IKLLQEAVHDGFETNARPTQPENERY<br>INSTYHSFGIEKQQ |
| <b>I</b> | Q84UV8       | Nectarin-II<br><br>From: <i>Nicotiana langsdorffii</i><br>× <i>Nicotiana sanderae</i> | Pep1: (-) AEVVSLNGLLQK (-)<br>Pep2: (-) <u>EAVVSNLGLLQK</u> (-)<br>Pep3: (-) NATAVEYELAYHNT<br>LNETQYLAKG (-)<br>Pep4: (-) NATAVEYELKGYHT<br><u>LNETQYALGK</u> (-)<br>Pep5: (-) NAMRVRRRTCKDA<br>NRHQWATLLNR (-)<br>Pep6: (-) NAVRMRRRTCKDA<br>NRHQWATLLNR (-)                                                                                                                     | MRMAAITKMLFISFLFLSSVFLARSG<br>EVDDSESEFSYDEKSENGPANWGNIRP<br>DWKECSGKLSQSPIDIFDLRAEVVSNL<br><u>RILQKDYKPSNATLLNRGHDIMLRLD</u><br>DGGYLKINETQYQLKQLHWHHTPSEHT<br>INGERFNLAEHLVHESNNGKFVVI<br>VYEIGLWDPFPLSMIENDLKVPANKK<br>GIERGIGIIDPNQIKLDGKKYFRYIG<br>SLTTPPCTEGVWVIIDRVKVTVTRRQ<br>IKLLQEAVHDGFETNARPTQPENERY<br>INSTYHSFGIEKQQ |

**Protein identification data**

| Spot N°  | Accession N° | Name of protein                                                                      | Peptide Sequence                                                                                                                                                                                                                                                                                                                                                                                                                                        | Protein sequence                                                                                                                                                                                                                                                                                                                                                                                                                                                                                                                                                                                                                                                                                                                                                                                                                                                                                               |
|----------|--------------|--------------------------------------------------------------------------------------|---------------------------------------------------------------------------------------------------------------------------------------------------------------------------------------------------------------------------------------------------------------------------------------------------------------------------------------------------------------------------------------------------------------------------------------------------------|----------------------------------------------------------------------------------------------------------------------------------------------------------------------------------------------------------------------------------------------------------------------------------------------------------------------------------------------------------------------------------------------------------------------------------------------------------------------------------------------------------------------------------------------------------------------------------------------------------------------------------------------------------------------------------------------------------------------------------------------------------------------------------------------------------------------------------------------------------------------------------------------------------------|
| <b>J</b> | Q94EG3       | Nectarin-I<br><br>From: <i>Nicotiana langsdorffii</i><br>× <i>Nicotiana sanderae</i> | Pep1: (-)NSSPAVSLGTN (-)<br>Pep2: (-)SNSPAVSLTGN (-)<br>Pep3: (-)NSSPAVNTTR (-)<br>Pep4: (-)TLPALNTLLALSLR (-)<br>Pep5: (-)TLPALNTLLTGLLR (-)<br>Pep6: (-)TLPALNTLLTRLAV (-)<br>Pep7: (-)VDGFPCCK (D)<br>Pep8: (K)GEVVFVFP (G)<br>Pep9: (-)VATVLSPR (-)<br>Pep10: (-)VATVSLPR (-)<br>Pep11: (-)VGPVSLPR (-)<br>Pep12: (-)VPGVSLPR (-)<br>Pep13: (-)VPGLALVLRDFP (-)<br>Pep14: (-)VPGLAVLLRDFP (-)<br>Pep15: (R)GLVHFQK (N)<br>Pep16: (-)VPGLNTLKLWR (-) | MAAFGINSKIFQSMEMAILFLLAIS I<br>DRYCFAADEDMLQDVCVADLHSHKVKV<br>NGFPCKTNFTAADFSSLAISKPGATN<br>NKFGSVVTTANVEQVPGNLTLGVSLA<br>RIDYAPGGINPPHHPRASEMVFVME<br>GELDVGFITANVLSKKIKGEVVFV<br>FPRGLVHFQKNNGEVPAAVISAFNSQ<br>LPGTQSIPTILFGASPPVDDVLAQT<br>EQINTEDVQQIKSKFAPVKKF                                                                                                                                                                                                                                                                                                                                                                                                                                                                                                                                                                                                                                            |
| <b>K</b> | Q9LM03       | Methionine synthase<br><br>From: <i>Solanum tuberosum</i>                            | Pep1: (-)VDPALNTLLLATVR (-)<br>Pep2: (-)DIFDSMAADR (-)<br>Pep3: (-)LTPALNTLLLATVR (-)<br>Pep4: (-)TLPALNTLLLATVR (-)<br>Pep5: (R)IPSTDEIADR (I)<br>Pep6: (R)IPSTEEIADR (I)<br>Pep7: (K)VVEVNALAK (A)<br>Pep8: (K)YLFAGVVDGR (N)<br>Pep9: (K)GVTGFGFDLVR (G)<br>Pep10: (-)FPRGIGR (-)<br>Pep11: (R)GNASVPAMEMTK (W)<br>Pep12: (-)TVSPATLNSR (-)<br>Pep13: (K)ISEEDYVK (A)<br>Pep14: (K)ISEEEYVK (A)<br>Pep15: (K)YGAGIGPGVY<br>DIHSPR (I)                | MASHVVGYPYPRMGPKRELKFALESFWDG<br>KSSAEDLKKVSADLRSSIWQMSDAGI<br>KYIPSNFTFSYYDQVLDTTAMLGAVPSR<br>YNWTGGEIEFGTYFMSARGNASVPAME<br>MTKWFDNTNYHFIVPELGPDVNFYSYASH<br>KAVNEYKEAKAQGVDTPVVLVGPVSYL<br>LLSKPAKGVEKSFLLSLLDKILPIYK<br>EVIAELKAAGASWIQLDEPTLVLDLES<br>HKLEAFTKAYADLESLSGLNLVLVETY<br>FADVPAEAFKTLTALKGVTAFGFDLVR<br>GTQTLELIKSSFPSPGKYLAFAGVVDGRN<br>IWANDLAASLALLQSLEGVVGKDKLVA<br>STSCSLHTAVDLINETKLDDEIKSWL<br>AFAAQKVVEVNALAKALSGAKDEAFFS<br>ANAAAQASRKSSPRVTNEAVQKASAAL<br>QGS DHRRATNVSARLDAQQKLNLPIL<br>PTTTIGSFPQTVELRRVRREYKAKKLS<br>EEEYVKAITEEIKKVVDLQEELDIDVL<br>VHGEPERNMVEYFGEQLSGFAFTANG<br>WVQSYGSRCKVPPPIYGDVSRPKPMTV<br>FWSSKAQEMTKRPMKMLTGPVTILNW<br>SFVRNDQPRFETCYQIALAIKDEVEDL<br>EKAGITVIQIDEAALREGLPLRKAHA<br>FYLWAVHVSFRITNVGIEDTTQIHTHM<br>CYSNFNDIHSIIDMDADVITIENSRS<br>DEKLLSVFREGVKYGAGIGPGVYDIHS<br>PRIIPSTEEIADRVNKMLAVLDTNLIWV<br>NPDGGLKTRKYTEVKPALQNMVSAAKT<br>IRTQLASAK |



**Protein identification data**

| Spot N° | Accession N° | Name of protein                                                                      | Peptide Sequence                                                                                                                                                                                                                                                                                                                                                                                                                                                                                                                                                                                                                     | Protein sequence                                                                                                                                                                                                                                                                                                                                     |
|---------|--------------|--------------------------------------------------------------------------------------|--------------------------------------------------------------------------------------------------------------------------------------------------------------------------------------------------------------------------------------------------------------------------------------------------------------------------------------------------------------------------------------------------------------------------------------------------------------------------------------------------------------------------------------------------------------------------------------------------------------------------------------|------------------------------------------------------------------------------------------------------------------------------------------------------------------------------------------------------------------------------------------------------------------------------------------------------------------------------------------------------|
| L       | Q94EG3       | Nectarin-I<br><br>From: <i>Nicotiana langsdorffii</i><br>× <i>Nicotiana sanderae</i> | Pep1: (-) NSSPAVSLGTN (-)<br>Pep2: (-) SNSPAVSLTGN (-)<br>Pep3: (-) NSSPAVNTTR (-)<br>Pep4: (-) TLPALNTLLALSLR (-)<br>Pep5: (-) TLPALNTLLTGLLR (-)<br>Pep6: (-) TLPALNTLLTRLAV (-)<br>Pep7: (-) <u>VDGFPCCK</u> (D)<br>Pep8: ( <u>K</u> ) <u>GEVVFVFP</u> (G)<br>Pep9: (-) VATVLSFR (-)<br>Pep10: (-) VATVSLPR (-)<br>Pep11: (-) VGPVSLPR (-)<br>Pep12: (-) VPGVSLPR (-)<br>Pep13: (-) VPGLALVLRDFP (-)<br>Pep14: (-) VPGLAVLLRDFP (-)<br>Pep15: ( <u>R</u> ) <u>GLVHFQK</u> (N)<br>Pep16: (-) VPGLNTLKLWR (-)                                                                                                                       | MRMAAITKMLFISFLFLSSVFLARSG<br>EVVDESEFSYDEKSENGPANWGNIRP<br>DWKECSGK <u>LOSPIIDIFDLRAE</u> VVSNL<br><u>RILQKDYKPSNATLLNRGHDIMLR</u> LD<br>DGGYLKINETQYQLKQLHWHTPSEHT<br>INGERFNFLEAHLVHESNNGKFVVI<br>VYEIGLWDPDFLSMIENDLKVPANKK<br>GIERGIGI <u>IDPNQIKLDGK</u> KYFRYIG<br>SLTTPPCTEGVWVIIDRVKVTVTRRQ<br>IKLLQEAVHDGFETNARPTQPENERY<br>INSTYHSFGIEKQQ |
| M       | Q94EG3       | Nectarin-I<br><br>From: <i>Nicotiana langsdorffii</i><br>× <i>Nicotiana sanderae</i> | Pep1: (-) DVPALNTLPKGSRK (-)<br>Pep2: (-) LTPALNTPGKLSRK (-)<br>Pep3: (-) TLPALNTPGKLSRK (-)<br>Pep4: (-) TGHVFP (-)<br>Pep5: (-) EGVVFVFP (-)<br>Pep6: (-) <u>GEVVFVFP</u> (-)<br>Pep7: (-) VPGLNTLGVTA VR (-)<br>Pep8: (-) VPGLNTLGVTLGR (-)<br>Pep9: (-) <u>VPGLNTLGVTVAR</u> (-)<br>Pep10: (-) LENQKGHSR (-)                                                                                                                                                                                                                                                                                                                     | MAAFGINSKIFQSMEMAILFLLAIS I<br>DRYCFAADEDMLDQVCVADLHSHKVKV<br>NGFPCKNTFTAADFSSLAISKPGATN<br>NKFGSVVTTANVEQ <u>VEGLNTLGVSLA</u><br><u>RIDYAPGGINPPTHPRASEMVFVME</u><br>GELDVGFITANVLSKKIK <u>GEVVFV</u><br><u>FPRGLVHFQK</u> NGEVPAAVISAFNSQ<br>LPGTQSIPITLFGASPPVDDVLAQT<br>FQINTEDVQIKSKFAPVKKF                                                     |
| N       | Q9SM34       | Germin-like protein<br><br>From: <i>Triticum estivum</i>                             | Pep1: (-) DPPNSLGGSQK (-)<br>Pep2: (-) PDPNSLGGSQK (-)<br>Pep3: (-) PDPNSLGGSQK (-)<br>Pep4: (-) ANYDGLYALATDAR (-)<br>Pep5: (-) NAYDGLYALATDAR (-)<br>Pep6: (-) NAYDGLYASVVDAR (-)<br>Pep7: (-) DFLEDKLR (-)<br>Pep8: (-) DFLEDKLR (-)<br>Pep9: (-) <u>LTPALNTLGLTLLR</u> (-)<br>Pep10: (-) TLPALNTLGLTLLR (-)<br>Pep11: (-) TLPALNTLLGTLR (-)<br>Pep12: (-) <u>ASDPPLSDDYLAK</u> (-)<br>Pep13: (-) SADPPLSDDYLAK (-)<br>Pep14: (-) TGDPPPLSDDYLAK (-)<br>Pep15: (-) MVLEELR (-)<br>Pep16: (-) APNLTLRKLQK (-)<br>Pep17: (-) PNALTLRKLQK (-)<br>Pep18: (-) DEASYLNVSNCNGGR (-)<br>Pep19: (-) FLLDELRL (-)<br>Pep20: (-) FVLEELR (-) | MASSSSFLLLAALLALVSWQATAS<br>DPSPLQDFCVADMNSPVRVNGFVC<br>KNPMEVNADDFKAAANLDKPKMPN<br>KVGSNVTLINVMQIAGLNTL <u>GIS I</u><br><u>ARIDYAPLGQNPPTHPRATEILT</u><br>VLEGTLYVGFVTSNQAPAPNKNKFL<br>SKVLNKGDFVFPVGLIHQFNP<br>PHQPAVAIAALSSQNPGAITIANA<br><u>VFGSDPPISSDVLAKAFQVEKNTI</u><br>DYLQAQFWENNHY                                                        |

**Protein identification data**

| Spot<br>N° | Accession<br>N° | Name of protein                                      | Protein identification data                                                                                                                                                                                                                                                                                                                                                                                                                                                                                                                                                                                                                                                                           |                                                                                                                                                                                                                                                                                              |
|------------|-----------------|------------------------------------------------------|-------------------------------------------------------------------------------------------------------------------------------------------------------------------------------------------------------------------------------------------------------------------------------------------------------------------------------------------------------------------------------------------------------------------------------------------------------------------------------------------------------------------------------------------------------------------------------------------------------------------------------------------------------------------------------------------------------|----------------------------------------------------------------------------------------------------------------------------------------------------------------------------------------------------------------------------------------------------------------------------------------------|
|            |                 |                                                      | Peptide Sequence                                                                                                                                                                                                                                                                                                                                                                                                                                                                                                                                                                                                                                                                                      | Protein sequence                                                                                                                                                                                                                                                                             |
| <b>O</b>   | Q2QXJ4          | Germin-like protein<br><br>From: <i>Oryza sativa</i> | Pep1: (-) PDPNSNSLQK (-)<br>Pep2: (-) PDPNSSAGVQK (-)<br>Pep3: (-) NTPALLGLTNTLLR (-)<br>Pep4: (-) QSPALLGLTNTLLR (-)<br>Pep5: (-) TNPALLGLTNTLLR (-)<br>Pep6: (-) LPANYDGLHPPGVMAR (-)<br>Pep7: (-) KSWDNSTIAAAAGSVMK (-)<br>Pep8: (-) LPANYDGLYASVVDAR (-)<br>Pep9: (-) LTPALNGLTLLR (-)<br>Pep10: (-) TLPALNTLGLTLLR (-)<br>Pep11: (-) FGLVVPNSSNLQK (-)<br>Pep12: (-) GFVLVPNSSNLQK (-)<br>Pep13: (-) YDGLYAATEVAR (-)<br>Pep14: (-) <u>LLNAGDVVFVFPQGH</u> (-)<br>Pep15: (-) LLNQDVVFVFPQGH (-)<br>Pep16: (-) AFHISPR (-)<br>Pep17: (-) MVLEDKLR (-)<br>Pep18: (-) LYSAVPSSLLFASDP<br><br>PLSDDYLAK (-)<br>Pep19: (-) <u>LYSAVPSTLVFASD</u><br><br>PPLSDDYLAK (-)<br>Pep20: (-) YDGLYAPGFVAR (-) | MASSNFFLPTALIALVATQAMAFDPS<br>PLQDFCVADRNSPVRVNGFPCKDAKD<br>VNVDDFFLEANLDKPMDDTKSKAGSN<br>VTLINVMKLTGLNTLIGSMARIDYAP<br>KGQNPPTHPRATEILTVFEGTLYVG<br>FVTSNQANGENKLFKTKL <u>LNKGDVVFV</u><br><u>PQGLIHFQFNPSYDKPAVAIAALSSQ</u><br>NPGAITIANAVFGSNPPIFDDVLAKA<br><br>FQVDDKAVDWLQAQFWENNHN     |
| <b>P</b>   | ACG41245.1      | Germin-like protein<br><br>From: <i>Zea mays</i>     | Pep1: (-) MVLEDKLR (-)<br>Pep2: (-) NAYDGLYALATDAR (-)<br>Pep3: (-) NAYDGLYASVVDAR (-)<br>Pep4: (-) NPAADAAPAGGGGALP<br><br>GLGPWPPQFSPLASS<br>AGYAPSTDAR (-)<br>Pep5: (-) NPTPSNPAGGGGAL<br><br>PGLGPWPPQFSPLA<br>SSAGYAPSTDAR (-)<br>Pep6: (-) PALNTLLKAVEL (-)<br>Pep7: (-) PALNTLLKNNAL (-)<br>Pep8: (-) PYLEDKLR (-)<br>Pep9: (-) PYLEKDLR (-)<br>Pep10: (-) SLFASDPPLSDLYAK (-)<br>Pep11: (-) SLFASDPPLSDDLYAK (-)<br>Pep12: (-) SLFASDPPLSVDEYAK (-)<br>Pep13: (-) TLGPVNQSFALNTL<br><br>GLTLLR (-)<br>Pep14: (-) TLNPRQAYPALNTLG<br><br>LTLLR (-)<br>Pep15: (-) TLPALNGLTLLR (-)<br>Pep16: (-) TLPALNTLGLTLLR (-)                                                                             | MASSLVLVAALLALASSWQQA<br>IAYDPSPLQDFCVADKNSPVRV<br>NGFPCKDPMAVTPDDFFNAAMI<br>IDKRRDTNNKVGSNVTNVNV <u>ES</u><br><u>FPGNLTLGISLAR</u> IDYAPLGVN<br>PPHIHPRATELLTVLEGTLYLG<br>FVTSNPNRFLSKVVKKGDVVFV<br>PKAMIHFMNLDHDKPAAALSS<br>LSSQNPGVITIASAVFGSKPPI<br>SDDVLAKAFQVEKKLIDWLQSQ<br><br>FWDTNY |

**Protein identification data**

| Spot N° | Accession N° | Name of protein                                                       | Peptide Sequence                                                                                                                                                                                                                                                                                                                                                                                                                                                                                            | Protein sequence                                                                                                                                                                                                                                                                                                                                                                                                                                                                                                                                    |
|---------|--------------|-----------------------------------------------------------------------|-------------------------------------------------------------------------------------------------------------------------------------------------------------------------------------------------------------------------------------------------------------------------------------------------------------------------------------------------------------------------------------------------------------------------------------------------------------------------------------------------------------|-----------------------------------------------------------------------------------------------------------------------------------------------------------------------------------------------------------------------------------------------------------------------------------------------------------------------------------------------------------------------------------------------------------------------------------------------------------------------------------------------------------------------------------------------------|
| Q       | Q9SM34       | Germin-like protein<br><br>From: <i>Triticum estivum</i>              | Pep1: (-) EATVLSPR (-)<br>Pep2: (-) NAGPCPANAAAA<br>SSALNPAGFK (-)<br>Pep3: (-) DDNHEILR (-)<br>Pep4: (-) PALNTLLTLTPK (-)<br>Pep5: (-) NAYDGLYASVVDNL (-)<br>Pep6: (-) NAGPGSGPSAAAA<br>SSALNPAGFK (-)<br>Pep7: (-) PALNTLLTLGLR (-)<br>Pep8: (-) ANYDGLYASVVDAR (-)<br>Pep9: (-) MVLEDKLR (-)<br>Pep10: (-) MVLEELR (-)<br>Pep11: (-) MVLENGVK (-)<br>Pep12: (-) LTPALNTLGLTLLR (-)<br>Pep13: (-) ASDPPLSDDYLAK (-)<br>Pep14: (-) TGDPPLSDDYLAK (-)<br>Pep15: (-) TYLEDKLR (-)<br>Pep16: (-) TYKNDKLR (-) | MASSSFLLLAALLALVSWQATASDP<br>SPLQDFCVADMNSPVRVNGFVCKNPM<br>EVNADDFFKANLDKPKMPNKVGSNV<br>TLINVMQIAGLNTLGLSIARIDYAPL<br>GQNPPTHPRATEILTVEGLTYVGF<br>VTSNQPAFNKFKLSKVLNKGDFVVF<br>PVGLIHFQFNPNPHQPAVAIAALSSQ<br>NPGAITIANAVFGSDPEPISDDVLAKA<br>FQVEKNTIDYLAQWFENNHY                                                                                                                                                                                                                                                                                    |
| S       | Q9GEP9       | Ribulose biphosphate carboxylase<br><br>From: <i>Primula palinuri</i> | Pep1: (-) DPPNSLGGNTK (-)<br>Pep2: (-) PDPNSLGGNTK (-)<br>Pep3: (-) PDPNSLGGSQK (-)<br>Pep4: (-) NADPATPNGVASSAL<br>NPNQFK (-)<br>Pep5: (-) NADPSVNPAAASSA<br>LNPNGAFK (-)<br>Pep6: (-) RDGDLAAGNGK (-)<br>Pep7: (-) ANYDGLYKEVDAR (-)<br>Pep8: (-) NAYDGLYKDLAR (-)<br>Pep9: (-) LTPALNTLGLTLLR (-)<br>Pep10: (-) TLPALNGLTLTLLR (-)<br>Pep11: (-) GIYFTQDWVSL (-)<br>Pep12: (-) MVLEDLR (-)<br>Pep13: (-) NAYDGLYAPQVFR (-)<br>Pep14: (-) EFRQQVEDVK (-)                                                  | KAGVGFKAGVKGYKVTYYTPEYDPKD<br>TDILAAFRVTPQGPVPEEAGAAVAA<br>ESSTGTWTTVWTDGLTNLDRYKRCY<br>HIEPVAGEENQFIAYVAYPLDLFEEG<br>AVTNMFTSIVGNVGFKALRALRLED<br>LRIPPAYVKTQGPPIHQVERDKLN<br>KYGRPLLGCTIKPKLGLSAINPGRAV<br>YECLRGGLDFTKDDENVNSQPFMRWX<br>DRFLFCAEALYKAQAETGEIKGHYLN<br>LTAGTCEEMIKRAVFARELGVPVIMH<br>DYLTTGGFTANTSLSHYCRDNGLLLHI<br>HRAMHAVIDRQKNHGIHFRVLAKXLR<br>MSGGDHIHSGTVVVGKLEGERXITLGL<br>VDLLRDDYIEKDRSRGIYFTQDWVSL<br>PGVLPVASGGIHWHPALTEIFGDD<br>SVLQFGGGTLGHPWENAPGAVANRVA<br>LEACVQARNEGRDLAAEGNEIIREAC<br>KWSPELAAACEVWKEIKFEFEAMDTL |

**Protein identification data**

| Spot<br>N° | Accession<br>N° | Name of protein                                            | Protein identification data                                                                                                                                                                                                                                                                                                                                                                                                              |                                                                                                                                                                                                                                                                                                           |
|------------|-----------------|------------------------------------------------------------|------------------------------------------------------------------------------------------------------------------------------------------------------------------------------------------------------------------------------------------------------------------------------------------------------------------------------------------------------------------------------------------------------------------------------------------|-----------------------------------------------------------------------------------------------------------------------------------------------------------------------------------------------------------------------------------------------------------------------------------------------------------|
|            |                 |                                                            | Peptide Sequence                                                                                                                                                                                                                                                                                                                                                                                                                         | Protein sequence                                                                                                                                                                                                                                                                                          |
| <b>T</b>   | A8QK89          | Germin-like protein<br><br>From: <i>Vitis vinifera</i>     | Pep1: (-) <u>GGV</u> GKSTTAVNIAVALAK (-)<br>Pep2: (-) ANYDGLYASNQAAAR (-)<br>Pep3: (-) GDFLSNYASNQAAAR (-)<br>Pep4: (-) LTPALNTLGLTLLR (-)<br>Pep5: (-) TLPALNGLTLTLLR (-)<br>Pep6: (-) TLPALNTLGLTLLR (-)<br>Pep7: (-) FDLEDKLR (-)<br>Pep8: (-) MVLEDLR (-)<br>Pep9: (-) MVLEDKLR (-)<br>Pep10: (-) ASDPPLSDDYLAK (-)<br>Pep11: (-) TGDPPPLSDDYLAK (-)<br>Pep12: (-) VYLEDKLR (-)<br>Pep13: (-) FVLEDLR (-)<br>Pep14: (-) TYKNDKLR (-) | MALASSFASASDPSPLQDTCVAIDEP<br>KNAVFVNGKFKKNPNTVAEDFFSKG<br>LNI PGNTSNLVGSSVTVNVDVIPGL<br>NTLGISLVRIDYAPYGQNPPHTHPRA<br>TEILTVLEGTLLVGFVTSNPQNRLFS<br>KVLNKGDFVVFPIGLIHQFNIGHMN<br>AVAIAGLSSQNPGVITIANAVFGSNE<br>PINPDELAKAFQLDKKVGFEFLQARF                                                                |
| <b>U</b>   | O24500          | Glycolate oxidase<br><br>From: <i>Arabidopsis thaliana</i> | Pep1: (-) VDLDPGFLNA (-)<br>Pep2: (-) <u>VPVFLDGGVRR</u> (-)<br>Pep3: (-) LTPALNTLGLTLLR (-)<br>Pep4: (-) TLPALNGLTLTLLR (-)<br>Pep5: (-) ELVKQK (-)<br>Pep6: (-) GVPVSLPR (-)<br>Pep7: (-) VPGVSLPR (-)<br>Pep8: (-) MVLEDLR (-)<br>Pep9: (-) VMLEDLR (-)<br>Pep10: (-) MVLEDKLR (-)                                                                                                                                                    | ATSSVEKIASTGPGIRFFQLYVYKNR<br>KVVEQLVRKAEKAGFKAIALTVNTPR<br>LGPKKSDIKNRFTLPPNLT LKNFEGL<br>DLGKMDEANDSGLASYVAGQIDRTLS<br>WKDIQWLQITITNMPILVKGVLTGEDA<br>RIAIQAGAAGIIVSNHGARQLDYVPA<br>TISALEEVVKATQGGVPVFLDGGVRR<br>GTDVFKALALGTSGIFIGRPVVFALA<br>AEGEAGVKKVLQMLRDEFELTMALSG<br>CRSISEITRNHIVTEWDIPRHLPRL |

**Supplemental Table III. Alignment details of sequenced peptides (Query) with the identified proteins (Sbjct)**

Only peptides with an alignment match above 50 % are presented in this table.

| Spot N° | Peptide alignment details |                                                                                                                                                                                                                                                                   |
|---------|---------------------------|-------------------------------------------------------------------------------------------------------------------------------------------------------------------------------------------------------------------------------------------------------------------|
| 1       | Pep6                      | <p>Score = 180 (91.1 bits)<br/>           Identities = 25/25 (100%), Positives = 25/25 (100%)<br/>           Query: 1 ASCGGTACVNSFGDEQLAVDMLADK 25<br/>                     ASCGGTACVNSFGDEQLAVDMLADK<br/>           Sbjct: 112 ASCGGTACVNSFGDEQLAVDMLADK 136</p> |
| 2       | Pep8                      | <p>Score = 142 (72.7 bits)<br/>           Identities = 17/17 (100%), Positives = 17/17 (100%)<br/>           Query: 1 GHYMNITAATMEEMYER 17<br/>                     GHYMNITAATMEEMYER<br/>           Sbjct: 172 GHYMNITAATMEEMYER 188</p>                         |
| 3       | Pep1                      | <p>Score = 63 (33.3 bits)<br/>           Identities = 10/12 (83%), Positives = 11/12 (91%)<br/>           Query: 2 AEVVSNLGLLQK 13<br/>                     AEVVSNL +LQK<br/>           Sbjct: 72 AEVVSNLRILQK 83</p>                                             |
| 5       | Pep1                      | <p>Score = 49 (26.1 bits)<br/>           Identities = 8/10 (80%), Positives = 9/10 (90%)<br/>           Query: 4 VVSNLGLLQK 13<br/>                     VVSNL +LQK<br/>           Sbjct: 74 VVSNLRILQK 83</p>                                                     |
|         | Pep5                      | <p>Score = 58 (30.5 bits)<br/>           Identities = 6/10 (60%), Positives = 9/10 (90%)<br/>           Query: 2 LGTLDPNQLK 12<br/>                     +G +DPNQ+K<br/>           Sbjct: 188 IGIIDPNQIK 197</p>                                                   |

| Spot<br>N° | Peptide alignment details                                                                                                                                                                                                                             |
|------------|-------------------------------------------------------------------------------------------------------------------------------------------------------------------------------------------------------------------------------------------------------|
| 32         | <p>Score = 42 (22.9 bits)<br/>           Identities = 7/9 (77%), Positives = 8/9 (88%)<br/>           Query: 4 VSNLGLLQK 13<br/>                     VSNL +LQK<br/>           Sbjct: 75 VSNLRILQK 83</p>                                              |
|            | <p>Score = 58 (30.9 bits)<br/>           Identities = 6/10 (60%), Positives = 9/10 (90%)<br/>           Query: 2 LGTLDPNQLK 12<br/>                     +G +DPNQ+K<br/>           Sbjct: 188 IGIIDPNQIK 197</p>                                       |
|            | <p>Score = 66 (35.0 bits)<br/>           Identities = 8/9 (88%), Positives = 9/9 (100%)<br/>           Query: 12 LNETQYQLK 21<br/>                     +NETQYQLK<br/>           Sbjct: 111 INETQYQLK 119</p>                                          |
| 35         | <p>Score = 36 (19.6 bits)<br/>           Identities = 8/12 (66%), Positives = 8/12 (66%)<br/>           Query: 1 AEVVSLVANLQK 12<br/>                     AEVVS LQK<br/>           Sbjct: 72 AEVVSNLRILQK 83</p>                                      |
|            | <p>Score = 66 (34.4 bits)<br/>           Identities = 8/9 (88%), Positives = 9/9 (100%)<br/>           Query: 12 LNETQYQLK 21<br/>                     +NETQYQLK<br/>           Sbjct: 111 INETQYQLK 119</p>                                          |
| 37         | <p>Score = 168 (84.9 bits)<br/>           Identities = 21/21 (100%), Positives = 21/21 (100%)<br/>           Query: 1 MQWYAFHEEPAGGADAPNGMK 21<br/>                     MQWYAFHEEPAGGADAPNGMK<br/>           Sbjct: 303 MQWYAFHEEPAGGADAPNGMK 323</p> |

| Spot<br>N° | Peptide alignment details                                                                                                                                                                                                                     |
|------------|-----------------------------------------------------------------------------------------------------------------------------------------------------------------------------------------------------------------------------------------------|
| 38         | <p>Score = 56 (29.7 bits)<br/>           Identities = 7/11 (63%), Positives = 10/11 (90%)<br/>           Query: 1 LESPLDLLDLR 11<br/>                     L+SP+D+ DLR<br/>           Sbjct: 61 LQSPIDIFDLR 71</p>                             |
|            | <p>Score = 49 (26.2 bits)<br/>           Identities = 8/10 (80%), Positives = 9/10 (90%)<br/>           Query: 3 VVSNLGLLQK 13<br/>                     VVSNL +LQK<br/>           Sbjct: 74 VVSNLRILQK 83</p>                                 |
|            | <p>Score = 58 (30.7 bits)<br/>           Identities = 6/10 (60%), Positives = 9/10 (90%)<br/>           Query: 2 LGTLDPNQLK 12<br/>                     +G +DPNQ+K<br/>           Sbjct: 188 IGIIDPNQIK 197</p>                               |
|            | <p>Score = 39 (21.2 bits)<br/>           Identities = 6/6 (100%), Positives = 6/6 (100%)<br/>           Query: 28 ATLLNR 34<br/>                     ATLLNR<br/>           Sbjct: 90 ATLLNR 95</p>                                            |
| 39         | <p>Score = 131 (67.1 bits)<br/>           Identities = 19/19 (100%), Positives = 19/19 (100%)<br/>           Query: 1 AVAGDEAEPGTSKAAPPSR 19<br/>                     AVAGDEAEPGTSKAAPPSR<br/>           Sbjct: 11 AVAGDEAEPGTSKAAPPSR 29</p> |

| Spot N° | Peptide alignment details                                                                                                                                                                                           |
|---------|---------------------------------------------------------------------------------------------------------------------------------------------------------------------------------------------------------------------|
| 40      | <p>Score = 47 (25.2 bits)<br/>           Identities = 6/11 (54%), Positives = 10/11 (90%)<br/>           Query: 1 LESPLDVLELR 11<br/>                     L+SP+D+ +LR<br/>           Sbjct: 61 LQSPIDIFDLR 71</p>   |
|         | <p>Score = 47 (25.2 bits)<br/>           Identities = 6/11 (54%), Positives = 10/11 (90%)<br/>           Query: 2 LESPLDVLELR 13<br/>                     L+SP+D+ +LR<br/>           Sbjct: 61 LQSPIDIFDLR 71</p>   |
| 44      | <p>Score = 35 (19.3 bits)<br/>           Identities = 4/7 (57%), Positives = 7/7 (100%)<br/>           Query: 1 LESPLDV 8<br/>                     L+SP+D+<br/>           Sbjct: 61 LQSPIDI 67</p>                  |
|         | <p>Score = 38 (20.8 bits)<br/>           Identities = 8/12 (66%), Positives = 9/12 (75%)<br/>           Query: 1 AEVVS LNGLLQK 12<br/>                     AEVVS +LQK<br/>           Sbjct: 72 AEVVS NLRILQK 83</p> |
|         | <p>Score = 58 (30.8 bits)<br/>           Identities = 6/10 (60%), Positives = 9/10 (90%)<br/>           Query: 2 LGTLDPNQLK 11<br/>                     +G +DPNQ+K<br/>           Sbjct: 188 IGIIDPNQIK 197</p>     |
|         | <p>Score = 61 (32.3 bits)<br/>           Identities = 9/9 (100%), Positives = 9/9 (100%)<br/>           Query: 15 PSNATLLNR 24<br/>                     PSNATLLNR<br/>           Sbjct: 87 PSNATLLNR 95</p>         |



| Spot<br>N° | Peptide alignment details                                                                                                                                                                                               |
|------------|-------------------------------------------------------------------------------------------------------------------------------------------------------------------------------------------------------------------------|
| 54         | <p>Score = 30 (16.6 bits)<br/>           Identities = 3/4 (75%), Positives = 4/4 (100%)<br/>           Query: 2 MQLA 6<br/>                     MQ+A<br/>           Sbjct: 84 MQIA 87</p>                               |
|            | <p>Score = 43 (23.0 bits)<br/>           Identities = 6/10 (60%), Positives = 8/10 (80%)<br/>           Query: 5 LNTLGLTLLR 15<br/>                     LNTLG+ + R<br/>           Sbjct: 89 LNTLGISIAR 98</p>           |
|            | <p>Score = 68 (35.3 bits)<br/>           Identities = 10/12 (83%), Positives = 11/12 (91%)<br/>           Query: 2 SDPPLSDDYLAK 14<br/>                     SDPP+SDD LAK<br/>           Sbjct: 196 SDPPISDDVLAK 207</p> |
| 55         | <p>Score = 37 (20.0 bits)<br/>           Identities = 6/7 (85%), Positives = 6/7 (85%)<br/>           Query: 1 PALNTLG 7<br/>                     P LNTLG<br/>           Sbjct: 88 PGLNTLG 94</p>                       |
|            | <p>Score = 54 (28.4 bits)<br/>           Identities = 7/7 (100%), Positives = 7/7 (100%)<br/>           Query: 6 VFVFPQG 13<br/>                     VFVFPQG<br/>           Sbjct: 149 VFVFPQG 155</p>                  |
|            | <p>Score = 54 (28.4 bits)<br/>           Identities = 7/7 (100%), Positives = 7/7 (100%)<br/>           Query: 2 VFVFPQG 9<br/>                     VFVFPQG<br/>           Sbjct: 149 VFVFPQG 155</p>                   |

| Spot N° | Peptide alignment details                                                                                                                                             |
|---------|-----------------------------------------------------------------------------------------------------------------------------------------------------------------------|
| 57      | <p>Score = 55 (29.6 bits)<br/> Identities = 8/12 (66%), Positives = 9/12 (75%)<br/> Query: 3 PALNTLGLTLLR 14<br/> P LNTLG+ L R<br/> Sbjct: 62 PGLNTLGLISLVR 73</p>    |
|         | <p>Score = 33 (18.4 bits)<br/> Identities = 5/6 (83%), Positives = 6/6 (100%)<br/> Query: 3 KLATAN 9<br/> KLATA+<br/> Sbjct: 27 KLATAD 32</p>                         |
|         | <p>Score = 57 (30.6 bits)<br/> Identities = 8/10 (80%), Positives = 8/10 (80%)<br/> Query: 2 LNAGDVFVFP 12<br/> L GDVFVFP<br/> Sbjct: 120 LKTGDVFVFP 129</p>          |
| 83      | <p>Score = 44 (23.3 bits)<br/> Identities = 8/12 (66%), Positives = 8/12 (66%)<br/> Query: 3 PALNTLGLTLLR 15<br/> P LNTLG L R<br/> Sbjct: 94 PGLNTLGVSLAR 105</p>     |
|         | <p>Score = 75 (38.4 bits)<br/> Identities = 10/10 (100%), Positives = 10/10 (100%)<br/> Query: 1 KGEVVFVPRG 11<br/> KGEVVFVPRG<br/> Sbjct: 151 KGEVVFVPRG 160</p>     |
| 84      | <p>Score = 68 (35.0 bits)<br/> Identities = 10/12 (83%), Positives = 11/12 (91%)<br/> Query: 2 SDPPLSDDYLAK 14<br/> SDPP+SDD LAK<br/> Sbjct: 196 SDPPISDDVLAK 207</p> |

| Spot N° | Peptide alignment details                                                                                                                                                                                             |
|---------|-----------------------------------------------------------------------------------------------------------------------------------------------------------------------------------------------------------------------|
| 86      | <p>Score = 60 (31.5 bits)<br/> Identities = 9/10 (90%), Positives = 9/10 (90%)<br/> Query: 2 LNAGDVFVFP 12<br/> LN GDVFVFP<br/> Sbjct: 146 LNKGDVFVFP 155</p>                                                         |
|         | <p>Score = 63 (33.0 bits)<br/> Identities = 9/12 (75%), Positives = 11/12 (91%)<br/> Query: 2 SDPPLSDDYLAK 14<br/> S+PP+SDD LAK<br/> Sbjct: 194 SNPPISDDILAK 205</p>                                                  |
| 89      | <p>Score = 45 (23.9 bits)<br/> Identities = 6/6 (100%), Positives = 6/6 (100%)<br/> Query: 7 FSGLNM 13<br/> FSGLNM<br/> Sbjct: 11 FSGLNM 16</p>                                                                       |
|         | <p>Score = 50 (26.3 bits)<br/> Identities = 7/12 (58%), Positives = 8/12 (66%)<br/> Query: 2 PALNTLGLTLLR 14<br/> P LNT G+ L R<br/> Sbjct: 37 PGLNTMGISLVR 48</p>                                                     |
| A       | <p>Score = 150 (76.7 bits)<br/> Identities = 20/22 (90%), Positives = 20/22 (90%)<br/> Query: 82 VGEGTATQCISGFTAMDIPPPR 103<br/> VGEG A QCISGFTAMDIPPPR<br/> Sbjct: 456 VEGEGAAQCISGFTAMDIPPPR 477</p>                |
| B       | <p>Score = 197 (101.2 bits)<br/> Identities = 27/27 (100%), Positives = 27/27 (100%)<br/> Query: 1 NAAGFMNASSDGSNQQQLDLDRDAMSR 27<br/> NAAGFMNASSDGSNQQQLDLDRDAMSR<br/> Sbjct: 98 NAAGFMNASSDGSNQQQLDLDRDAMSR 124</p> |

| Spot<br>N° | Peptide alignment details                                                                                                                                          |
|------------|--------------------------------------------------------------------------------------------------------------------------------------------------------------------|
|            | <p>Score = 47 (25.2 bits)<br/> Identities = 6/11 (54%), Positives = 10/11 (90%)<br/> Query: 1 LESPLDVLELR 11<br/> L+SP+D+ +LR<br/> Sbjct: 61 LQSPIDIFDLR 71</p>    |
| <b>C</b>   | <p>Score = 49 (26.2 bits)<br/> Identities = 8/10 (80%), Positives = 9/10 (90%)<br/> Query: 3 VVSNLGLLQK 13<br/> VVSNL +LQK<br/> Sbjct: 74 VVSNLRILQK 83</p>        |
|            | <p>Score = 34 (18.7 bits)<br/> Identities = 5/9 (55%), Positives = 7/9 (77%)<br/> Query: 1 NALMLEGKK 9<br/> N + L+GKK<br/> Sbjct: 194 NQIKLDGKK 202</p>            |
| <b>D</b>   | <p>Score = 82 (42.9 bits)<br/> Identities = 11/11 (100%), Positives = 11/11 (100%)<br/> Query: 1 LEKEATYDDIK 11<br/> LEKEATYDDIK<br/> Sbjct: 77 LEKEATYDDIK 87</p> |

| Spot N°  | Peptide alignment details                                                                                                                                                                                         |
|----------|-------------------------------------------------------------------------------------------------------------------------------------------------------------------------------------------------------------------|
| <b>E</b> | <p>Score = 47 (25.1 bits)<br/>           Identities = 6/11 (54%), Positives = 10/11 (90%)<br/>           Query: 1 LESPLDVLELR 13<br/>                     L+SP+D+ +LR<br/>           Sbjct: 61 LQSPIDIFDLR 71</p> |
|          | <p>Score = 36 (19.7 bits)<br/>           Identities = 8/12 (66%), Positives = 8/12 (66%)<br/>           Query: 1 AEVVSLVANLQK 12<br/>                     AEVVS LQK<br/>           Sbjct: 72 AEVVSNLRILQK 83</p>  |
|          | <p>Score = 58 (30.6 bits)<br/>           Identities = 6/10 (60%), Positives = 9/10 (90%)<br/>           Query: 2 LGTLDPNQLK 12<br/>                     +G +DPNQ+K<br/>           Sbjct: 188 IGIIDPNQIK 197</p>   |
| <b>F</b> | <p>Score = 35 (19.2 bits)<br/>           Identities = 4/7 (57%), Positives = 7/7 (100%)<br/>           Query: 1 LESPLDV 7<br/>                     L+SP+D+<br/>           Sbjct: 61 LQSPIDI 67</p>                |
|          | <p>Score = 38 (20.7 bits)<br/>           Identities = 8/12 (66%), Positives = 9/12 (75%)<br/>           Query: 1 AEVVSLNGLLQK 12<br/>                     AEVVS +LQK<br/>           Sbjct: 72 AEVVSNLRILQK 83</p> |
|          | <p>Score = 58 (30.7 bits)<br/>           Identities = 6/10 (60%), Positives = 9/10 (90%)<br/>           Query: 2 LGTLDPNQLK 12<br/>                     +G +DPNQ+K<br/>           Sbjct: 188 IGIIDPNQIK 197</p>   |

| Spot N°  | Peptide alignment details                                                                                                                                           |
|----------|---------------------------------------------------------------------------------------------------------------------------------------------------------------------|
| <b>G</b> | <p>Score = 63 (33.4 bits)<br/> Identities = 10/12 (83%), Positives = 11/12 (91%)<br/> Query: 1 AEVVSNLGLLQK 12<br/> AEVVSNL +LQK<br/> Sbjct: 72 AEVVSNLRILQK 83</p> |
|          | <p>Score = 58 (30.9 bits)<br/> Identities = 6/10 (60%), Positives = 9/10 (90%)<br/> Query: 2 LGTLDPNQLK 12<br/> +G +DPNQ+K<br/> Sbjct: 188 IGIIDPNQIK 19</p>        |
| <b>H</b> | <p>Score = 56 (29.8 bits)<br/> Identities = 7/11 (63%), Positives = 10/11 (90%)<br/> Query: 1 LESPLDLLDLR 11<br/> L+SP+D+ DLR<br/> Sbjct: 61 LQSPIDIFDLR 71</p>     |
|          | <p>Score = 38 (20.8 bits)<br/> Identities = 8/12 (66%), Positives = 9/12 (75%)<br/> Query: 1 AEVVS LNGLLQK 12<br/> AEVVS +LQK<br/> Sbjct: 72 AEVVSNLRILQK 83</p>    |
|          | <p>Score = 58 (30.8 bits)<br/> Identities = 6/10 (60%), Positives = 9/10 (90%)<br/> Query: 2 LGTLDPNQLK 10<br/> +G +DPNQ+K<br/> Sbjct: 188 IGIIDPNQIK 197</p>       |

| Spot<br>N° | Peptide alignment details                                                                                                                                                                                             |
|------------|-----------------------------------------------------------------------------------------------------------------------------------------------------------------------------------------------------------------------|
| <b>I</b>   | <p>Score = 49 (26.1 bits)<br/>           Identities = 8/10 (80%), Positives = 9/10 (90%)<br/>           Query: 3 VVSNLGLLQK 10<br/>                     VVSNL +LQK<br/>           Sbjct: 74 VVSNLRILQK 83</p>         |
|            | <p>Score = 52 (27.6 bits)<br/>           Identities = 8/12 (66%), Positives = 9/12 (75%)<br/>           Query: 11 GYHTLNETQYAL 23<br/>                     GY +NETQY L<br/>           Sbjct: 107 GYLKINETQYQL 118</p> |
| <b>J</b>   | <p>Score = 75 (39.6 bits)<br/>           Identities = 10/10 (100%), Positives = 10/10 (100%)<br/>           Query: 1 KGEVVFVPRG 11<br/>                     KGEVVFVPRG<br/>           Sbjct: 151 KGEVVFVPRG 160</p>   |
|            | <p>Score = 67 (35.5 bits)<br/>           Identities = 9/9 (100%), Positives = 9/9 (100%)<br/>           Query: 1 RGLVHFQKN 10<br/>                     RGLVHFQKN<br/>           Sbjct: 159 RGLVHFQKN 167</p>          |

| Spot<br>N° | Peptide alignment details                                                                                                                                                                               |
|------------|---------------------------------------------------------------------------------------------------------------------------------------------------------------------------------------------------------|
| K          | <p>Pep6</p> <p>Score = 85 (42.6 bits)<br/> Identities = 11/12 (91%), Positives = 12/12 (100%)<br/> Query: 1 RIPSTEEIADRI 12<br/> RIPSTEEIADR+<br/> Sbjct: 704 RIPSTEEIADRV 715</p>                      |
| K          | <p>Pep7</p> <p>Score = 74 (37.4 bits)<br/> Identities = 11/11 (100%), Positives = 11/11 (100%)<br/> Query: 1 KVVEVNALAKA 11<br/> KVVEVNALAKA<br/> Sbjct: 357 KVVEVNALAKA 367</p>                        |
| K          | <p>Pep8</p> <p>Score = 87 (43.6 bits)<br/> Identities = 12/12 (100%), Positives = 12/12 (100%)<br/> Query: 1 KYLFAGVVDGRN 12<br/> KYLFAGVVDGRN<br/> Sbjct: 286 KYLFAGVVDGRN 297</p>                     |
| K          | <p>Pep9</p> <p>Score = 83 (41.7 bits)<br/> Identities = 12/13 (92%), Positives = 12/13 (92%)<br/> Query: 1 KGVTFGFDFLVRG 13<br/> KGVTFGFDFLVRG<br/> Sbjct: 259 KGVTAFGFDLVRG 271</p>                    |
| K          | <p>Pep11</p> <p>Score = 112 (55.6 bits)<br/> Identities = 14/14 (100%), Positives = 14/14 (100%)<br/> Query: 1 RGNASVPAMEMTKW 14<br/> RGNASVPAMEMTKW<br/> Sbjct: 99 RGNASVPAMEMTKW 112</p>              |
| K          | <p>Pep14</p> <p>Score = 75 (37.8 bits)<br/> Identities = 10/10 (100%), Positives = 10/10 (100%)<br/> Query: 1 KISEEEYVKA 10<br/> KISEEEYVKA<br/> Sbjct: 457 KISEEEYVKA 466</p>                          |
| K          | <p>Pep15</p> <p>Score = 135 (66.7 bits)<br/> Identities = 18/18 (100%), Positives = 18/18 (100%)<br/> Query: 1 KYGAGIGPGVYDIHSPRI 18<br/> KYGAGIGPGVYDIHSPRI<br/> Sbjct: 688 KYGAGIGPGVYDIHSPRI 705</p> |



| Spot<br>N° | Peptide alignment details                                                                                                                                                                                                |
|------------|--------------------------------------------------------------------------------------------------------------------------------------------------------------------------------------------------------------------------|
| L          | <p>Score = 49 (26.5 bits)<br/>           Identities = 6/7 (85%), Positives = 7/7 (100%)<br/>           Query: 1 VDGFPCK 7<br/>                     V+GFPCK<br/>           Sbjct: 52 VNGFPCK 58</p>                       |
|            | <p>Score = 75 (39.6 bits)<br/>           Identities = 10/10 (100%), Positives = 10/10 (100%)<br/>           Query: 1 KGEVVFVPRG 10<br/>                     KGEVVFVPRG<br/>           Sbjct: 151 KGEVVFVPRG 160</p>      |
|            | <p>Score = 67 (35.5 bits)<br/>           Identities = 9/9 (100%), Positives = 9/9 (100%)<br/>           Query: 1 RGLVHFQKN 9<br/>                     RGLVHFQKN<br/>           Sbjct: 159 RGLVHFQKN 167</p>              |
|            | <p>Score = 46 (25.0 bits)<br/>           Identities = 7/7 (100%), Positives = 7/7 (100%)<br/>           Query: 1 VPGLNTL 7<br/>                     VPGLNTL<br/>           Sbjct: 93 VPGLNTL 99</p>                      |
| M          | <p>Score = 62 (33.3 bits)<br/>           Identities = 8/8 (100%), Positives = 8/8 (100%)<br/>           Query: 1 GEVVFVPR 8<br/>                     GEVVFVPR<br/>           Sbjct: 152 GEVVFVPR 159</p>                 |
|            | <p>Score = 73 (38.9 bits)<br/>           Identities = 11/13 (84%), Positives = 11/13 (84%)<br/>           Query: 1 VPGLNTLGVTVAR 13<br/>                     VPGLNTLGV AR<br/>           Sbjct: 93 VPGLNTLGVSLAR 105</p> |

| Spot N° | Peptide alignment details                                                                                                                                                                                                         |
|---------|-----------------------------------------------------------------------------------------------------------------------------------------------------------------------------------------------------------------------------------|
| N       | <p>Score = 43 (23.1 bits)<br/>           Identities = 6/10 (60%), Positives = 8/10 (80%)<br/>           Query: 5 LNTLGLTLLR 15<br/>                     LNTLG+ + R<br/>           Sbjct: 89 LNTLGISIAR 98</p>                     |
|         | <p>Score = 68 (35.4 bits)<br/>           Identities = 10/12 (83%), Positives = 11/12 (91%)<br/>           Query: 1 SDPPLSDDYLAK 12<br/>                     SDPP+SDD LAK<br/>           Sbjct: 196 SDPPISDDVLAK 207</p>           |
| O       | <p>Score = 74 (38.7 bits)<br/>           Identities = 11/12 (91%), Positives = 11/12 (91%)<br/>           Query: 2 LNAGDVFVFPQG 12<br/>                     LN GDVFVFPQG<br/>           Sbjct: 148 LNKGDVFVFPQG 159</p>           |
|         | <p>Score = 76 (39.7 bits)<br/>           Identities = 11/15 (73%), Positives = 13/15 (86%)<br/>           Query: 10 VFASDPPLSDDYLAK 25<br/>                     VF S+PP+SDD LAK<br/>           Sbjct: 193 VFGSNPPISDDVLAK 207</p> |
| P       | <p>Score = 65 (34.0 bits)<br/>           Identities = 10/15 (66%), Positives = 12/15 (80%)<br/>           Query: 6 QSF PALNTLGLTLLR 21<br/>                     +SFP LNTLG+ L R<br/>           Sbjct: 87 ESF PGLNTLGISLAR 101</p> |

| Spot N° | Peptide alignment details                                                                                                                                                 |
|---------|---------------------------------------------------------------------------------------------------------------------------------------------------------------------------|
| Q       | <p>Score = 43 (22.9 bits)<br/> Identities = 6/10 (60%), Positives = 8/10 (80%)<br/> Query: 5 LNTLGLTLLR 15<br/> LNTLG+ + R<br/> Sbjct: 89 LNTLGISIAR 98</p>               |
|         | <p>Score = 68 (35.2 bits)<br/> Identities = 10/12 (83%), Positives = 11/12 (91%)<br/> Query: 2 SDPPLSDDYLAK 14<br/> SDPP+SDD LAK<br/> Sbjct: 196 SDPPISDDVLAK 207</p>     |
| S       | <p>Score = 33 (18.1 bits)<br/> Identities = 4/5 (80%), Positives = 5/5 (100%)<br/> Query: 12 SALNP 17<br/> SA+NP<br/> Sbjct: 174 SAINP 178</p>                            |
|         | <p>Score = 87 (44.9 bits)<br/> Identities = 11/11 (100%), Positives = 11/11 (100%)<br/> Query: 1 GIYFTQDWVSL 11<br/> GIYFTQDWVSL<br/> Sbjct: 354 GIYFTQDWVSL 364</p>      |
| T       | <p>Score = 39 (21.0 bits)<br/> Identities = 7/12 (58%), Positives = 8/12 (66%)<br/> Query: 3 V GKSTTAVNIAV 15<br/> VG S T VN+ V<br/> Sbjct: 63 VGSSVTTVNVDV <b>74</b></p> |
|         | <p>Score = 55 (28.8 bits)<br/> Identities = 8/12 (66%), Positives = 9/12 (75%)<br/> Query: 3 PALNTLGLTLLR 15<br/> P LNTLG+ L R<br/> Sbjct: 76 PGLNTLGLISLVR 87</p>        |
|         | <p>Score = 49 (25.9 bits)<br/> Identities = 7/12 (58%), Positives = 10/12 (83%)<br/> Query: 2 SDPPLSDDYLAK 14<br/> S+PP+ D+LAK<br/> Sbjct: 180 SNPPINPDFLAK 191</p>       |

| Spot<br>N° | Peptide alignment details                                                                                                                                    |
|------------|--------------------------------------------------------------------------------------------------------------------------------------------------------------|
| U          | Pep4<br>Score = 79 (40.7 bits)<br>Identities = 11/11 (100%), Positives = 11/11 (100%)<br>Query: 1 VPVFLDGGVRR 11<br>VPVFLDGGVRR<br>Sbjct: 172 VPVFLDGGVRR 18 |
